# Supplementary material for: Canonical Wnt and TGF-β/BMP signaling enhance melanocyte regeneration but suppress invasiveness, migration, and proliferation of melanoma cells
Source: Front Cell Dev Biol. 2023 Nov 13;11:1297910. doi: 10.3389/fcell.2023.1297910 (PMC10679360; doi:10.3389/fcell.2023.1297910)
Supplement: Supplementary file 2 [file Table3.XLSX]

## Sheet: GO-BP_1dpa
Supplementary Table 3: GO-BP terms enriched in 1dpa, 7dpa, melanoma and nevi by using all DEGs.
Category	Term	Count	PValue	log10(Pvalue)	Genes	List.Total	Pop.Hits	Pop.Total	Fold.Enrichment	Benjamini	FDR
GOTERM_BP	GO:0006260~DNA replication	49	2.7599e-12	-11.5591	orc4, rpa1, blm, mcm10, rrm2, mcm6, recql, pole, rmi1, rfc2, prim1, fen1, chaf1a, gins3, rfc3, pold3, rfc1, twnk, pcna, rrm2, mcm3, wrn, orc5, pole2, rpa2, lig4, prim2, wrnip1, dtl, pold1, mcmbp, rtel1, orc6, kin, gins2, mcm5, rrm1, top1l, mcm2, mcm9, recql4, mcm8, gins4, pold2, pola2, pola1, lrwd1, rev3l, lig1	3283	84	14912	2.64961	7.12606e-09	7.11226e-09
GOTERM_BP	GO:0006281~DNA repair	75	1.3207e-10	-9.8792	ube2a, smc5, ube2al, nsmce4a, smc3, mgmt, atr, rpa1, rad9a, blm, neil3, nsmce1, mms22l, primpol, NABP2, rad51, recql, rad17, rad52, pole, fen1, ube2t, chaf1a, fanci, flj11011l, rfc1, pds5b, ercc4, apex1, wrn, unga, trrap, sprtn, rpa2, rnf8, lig4, ercc1, rad50, msh6, parpbp, wrnip1, alkbh1, rev1, fancd2, fancc, prkdc, rtel1, dclre1b, psme4a, mus81, polk, nthl1, eepd1, tdp2b, mcm9, polm, rbbp8, msh…	3283	168	14912	2.02776	1.70502e-07	1.70172e-07
GOTERM_BP	GO:0006412~translation	107	8.96535e-07	-6.04743	slc25a3b, rps18, tcea2, ucp2, eif3s6ip, rsl24d1, rpl27, rpl28, rpl21, eif3ha, slc25a48, rps21, rpl18, eefsec, rps13, rps2, rpl22l1, sepsecs, slc25a43, rpl23, rpl34, rps8a, pelo, rps11, rps27.2, slc25a24, slc25a17, slc25a25a, rpl5b, slc25a23a, eif2ak3, rps7, rpl30, rpl35, rpl32, yars, vars2, rsl1d1, rars, slc25a1b, slc25a36a, rps28, rpl22, rpl39, slc25a25b, eif1axb, rpl4, slc25a35, eif6, rpl5a, ei…	3283	314	14912	1.54782	0.000771618	0.000770123
GOTERM_BP	GO:0007229~integrin-mediated signaling pathway	23	2.53867e-05	-4.59539	itgb1b, adam8a, zmp:0000001082, itga1, ilk, itgb6, itgb1a, itgb1bp1, itga11b, si:dkey-32n7.4, itgb4, itgbl1, itga6b, itga5, itga3b, itgae.2, itgb2, itga2b, itga9, itga3a, itgb3b, itga4, itgb5	3283	43	14912	2.42954	0.0163871	0.0163554
GOTERM_BP	GO:0000724~double-strand break repair via homologous recombination	18	6.7913e-05	-4.16805	smc5, rbbp8, blm, ube2nb, brca2, ercc4, nsmce1, tonsl, mms22l, fan1, rad51, recql, rad52, recql5, zfyve26, rad50, mcm9, XRCC2	3283	31	14912	2.6374	0.0350703	0.0350023
GOTERM_BP	GO:0006270~DNA replication initiation	14	9.26615e-05	-4.0331	cdc7, orc4, gins4, cdc45, mcm3, orc6, mcm10, pola1, orc5, pola2, mcm5, topbp1, mcm6, mcm2	3283	21	14912	3.02812	0.0398753	0.0397981
GOTERM_BP	GO:0006974~cellular response to DNA damage stimulus	42	0.000236989	-3.62527	parpbp, dtl, chek2, wdr76, rev1, cep63, pclaf, rtel1, nsmce1, kin, mms22l, mcm10, primpol, topbp1, dclre1b, psme4a, mus81, nthl1, fen1, tdp2b, ube2t, mcm9, chaf1a, yars, flj11011l, rbbp8, msh2, exo1, chd1l, apex1, tonsl, dclre1c, unga, fan1, rnf8, emsy, lig4, brat1, ccnd1, lig1, msh6, mre11a	3283	111	14912	1.71867	0.0874151	0.0872458
GOTERM_BP	GO:0051726~regulation of cell cycle	27	0.000606312	-3.2173	junba, dtl, tsc1b, gadd45ba, rps18, rps8a, jun, cables1, june, pclaf, rbl2, ccng2, rps7, ssrp1a, ccni, rpl35, rgcc, tsc1a, rpl23a, rpl36, phactr4a, rps15a, rpl7, rpl36a, jund, ccne2, gadd45ga	3283	64	14912	1.91624	0.195687	0.195308
GOTERM_BP	GO:0030225~macrophage differentiation	11	0.00109203	-2.96176	csf3b, csf3r, irf8, meis1b, casp8l2, wasla, flt3, spi1b, xpr1b, zgc:194469, csf3a	3283	17	14912	2.93906	0.313293	0.312686
GOTERM_BP	GO:0035023~regulation of Rho protein signal transduction	35	0.00146617	-2.83382	vav3b, arhgef40, si:dkey-91i10.2, ngef, arhgef19, itsn2a, plekhg4, tiam1a, si:dkey-172h23.2, plekhg5a, mcf2l2, CABZ01079663.1, tiam1b, bcr, vav2, ARHGEF17, arhgef6, fgd5a, net1, arhgef4, arhgef1a, arhgef10lb, arhgef16, triob, dlc1, si:dkey-38p12.3, rhoab, tiam2b, rasgrf2a, si:dkey-91m11.5, arhgef18a, arhgef12a, fgd4a, arhgef3, arhgef7b	3283	95	14912	1.67344	0.378566	0.377832
GOTERM_BP	GO:0022604~regulation of cell morphogenesis	9	0.00239346	-2.62097	camsap1b, si:ch211-266o15.1, zranb1b, fmnl2a, zmym4, qrich1, strip1, si:ch211-173p18.3, git2a	3283	13	14912	3.14459	0.543285	0.542233
GOTERM_BP	GO:0002042~cell migration involved in sprouting angiogenesis	6	0.00252495	-2.59775	fn1a, itga5, efnb2a, cxcr4a, cxcl12b, sirt1	3283	6	14912	4.54219	0.543285	0.542233
GOTERM_BP	GO:0006284~base-excision repair	13	0.00360108	-2.44357	neil1, dna2, recql4, neil3, apex1, wrn, si:ch211-161c3.6, unga, xrcc1, zgc:110224, nthl1, fen1, CT025742.1	3283	25	14912	2.36194	0.671013	0.669714
GOTERM_BP	GO:0045944~positive regulation of transcription from RNA polymerase II promoter	52	0.00363834	-2.4391	junba, ncoa3, tcf3b, mef2ca, rai1, aire, nfkb2, taf1, zgc:123305, creb3l2, meis3, hif1al2, atad2b, tp63, ccnl1a, ncoa6, tp73, hif1al, ccnl1b, egr1, jund, ssbp3b, ikzf2, zfat, taf4a, crtc2, jun, galn, rel, june, tp53bp1, hif1aa, prox2, ccnt2a, ssbp3a, brd4, ccnq, mef2aa, stat5a, tead3a, thraa, ahr1b, taf9, crtc1a, ppargc1a, mysm1, si:ch211-165g14.1, ccnt2b, taf2, creb3l1, znf750, creb3l3b	3283	163	14912	1.44904	0.671013	0.669714
GOTERM_BP	GO:0006310~DNA recombination	17	0.00431248	-2.36527	xrcc6, recql4, exo1, rpa1, blm, rtel1, mnd1, nsmce1, wrn, dclre1c, rpa2, recql, lig4, rad52, recql5, mus81, lig1	3283	38	14912	2.03203	0.742321	0.740884
GOTERM_BP	GO:0006303~double-strand break repair via nonhomologous end joining	8	0.00684119	-2.16487	dclre1a, rnf8, xrcc6, dclre1b, lig4, prkdc, dclre1c, pola1	3283	12	14912	3.02812	0.98234	0.980438
GOTERM_BP	GO:0051225~spindle assembly	8	0.00684119	-2.16487	haus3, map9, haus5, cep63, haus4, stil, haus1, haus6	3283	12	14912	3.02812	0.98234	0.980438
GOTERM_BP	GO:0009314~response to radiation	6	0.00722868	-2.14094	junba, dcun1d3, jund, jun, june, mecp2	3283	7	14912	3.8933	0.98234	0.980438
GOTERM_BP	GO:0019885~antigen processing and presentation of endogenous peptide antigen via MHC class I	6	0.00722868	-2.14094	tapbpl, erap1a, tapbp.2, erap1b, tapbp.1, erap2	3283	7	14912	3.8933	0.98234	0.980438
GOTERM_BP	GO:0006298~mismatch repair	9	0.00781728	-2.10694	xpc, msh2, exo1, rnaseh2a, msh5, pcna, mlh3, pms2, msh6	3283	15	14912	2.72531	1	0.99845
GOTERM_BP	GO:0035556~intracellular signal transduction	97	0.00909825	-2.04104	CABZ01005876.1, nuak1b, npr1b, braf, mcf2l2, dvl2, sh3bp5la, snrkb, stk38b, spsb3a, shc1, si:dkey-91m11.5, si:ch211-195b13.1, rasgrp4, shc2, plek2, gpr182, vav3b, wsb1, itsn2a, tiam1a, racgap1, ftr14, socs3a, dgkaa, plcd1a, net1, arhgef4, arhgef1a, rock2b, dgkzb, araf, PKN2 (1 of many), chn1, deptor, pdpk1a, asb8, snrka, sik1, wsb2, asb2b, npr2, sgk1, socs3b, rgs7b, sh3bp5lb, mknk2b, si:dkey-172h…	3283	350	14912	1.25883	1	0.99845
GOTERM_BP	GO:0000727~double-strand break repair via break-induced replication	5	0.00965469	-2.01526	cdc7, mus81, gins4, cdc45, gins2	3283	5	14912	4.54219	1	0.99845
GOTERM_BP	GO:0031848~protection from non-homologous end joining at telomere	5	0.00965469	-2.01526	dclre1a, dclre1b, terf2ip, terfa, dclre1c	3283	5	14912	4.54219	1	0.99845
GOTERM_BP	GO:0006302~double-strand break repair	12	0.0116249	-1.93461	rnf8, recql4, trip13, msh2, setx, BX649250.1, tdp2b, mnd1, mre11a, cdca5, parp3, wrn	3283	25	14912	2.18025	1	0.99845
GOTERM_BP	GO:0000028~ribosomal small subunit assembly	9	0.012653	-1.89781	rps15, rps17, zgc:114188, rrp7a, rps28, rps5, rps27.2, rps10, rps19	3283	16	14912	2.55498	1	0.99845
GOTERM_BP	GO:0002181~cytoplasmic translation	11	0.0174652	-1.75783	rpl6, mrto4, rpl36, ftsj1, rpl7l1, rpl7, eif3ja, rpl9, rpl22, rpl8, eif3jb	3283	23	14912	2.17235	1	0.99845
GOTERM_BP	GO:0007093~mitotic cell cycle checkpoint	7	0.0186416	-1.72952	NABP2, siah2l, BX682558.1, zwilch, chfr, nabp1b, ttk	3283	11	14912	2.89048	1	0.99845
GOTERM_BP	GO:0030155~regulation of cell adhesion	9	0.0193604	-1.71309	abl2, rhoua, lama5, ptk2ab, ppp1r12a, zgc:101783, si:ch211-241e1.3, lmo7a, lama1	3283	17	14912	2.40469	1	0.99845
GOTERM_BP	GO:0000027~ribosomal large subunit assembly	9	0.0193604	-1.71309	rpl6, rpl3, mrto4, rpl12, rpl5a, rpf2, rpl10, rsl24d1, rpl23a	3283	17	14912	2.40469	1	0.99845
GOTERM_BP	GO:0007131~reciprocal meiotic recombination	9	0.0193604	-1.71309	rad51, trip13, msh2, mlh3, rad50, mnd1, msh6, rad51c, XRCC2	3283	17	14912	2.40469	1	0.99845
GOTERM_BP	GO:0016569~covalent chromatin modification	28	0.0202961	-1.69259	phf2, hdac4, kdm5bb, banp, dpf3, ing5a, setd1ba, uhrf1, h2afy2, ing3, kdm8, brd4, ing5b, loxl2a, hdac5, h2afy, aebp2, si:dkeyp-118b1.2, jarid2b, mysm1, rnf8, ing2, bmi1a, lrwd1, emsy, setdb1a, suz12b, asf1ba	3283	84	14912	1.51406	1	0.99845
GOTERM_BP	GO:0010165~response to X-ray	5	0.0239142	-1.62134	cdkn1a, tp73, msh2, mdm2, tp63	3283	6	14912	3.78516	1	0.99845
GOTERM_BP	GO:0061515~myeloid cell development	9	0.0282566	-1.54888	csf3b, smad9, irf8, smad1, rnf145b, ak3, flt3, arhgef3, csf3a	3283	18	14912	2.27109	1	0.99845
GOTERM_BP	GO:0006887~exocytosis	21	0.0287013	-1.5421	sec22a, rims1b, mical3a, stx3a, cplane2, scrn2, si:dkey-45k15.1, exoc3l2a, exoc3l4, vamp8, rims1a, tnfaip2a, sytl1, si:dkey-196h17.9, sec22c, exoc5, exoc3l2b, syt4, rab25a, exoc3l1, vamp5	3283	60	14912	1.58977	1	0.99845
GOTERM_BP	GO:0051298~centrosome duplication	6	0.0291504	-1.53535	tubgcp2, sass6, tubgcp4, tubgcp3, tubgcp5, brca2	3283	9	14912	3.02812	1	0.99845
GOTERM_BP	GO:0000070~mitotic sister chromatid segregation	7	0.030442	-1.51653	nsl1, mis12, kif18a, dsn1, cep57l1, ncapd2, ncapg	3283	12	14912	2.64961	1	0.99845
GOTERM_BP	GO:0045737~positive regulation of cyclin-dependent protein serine/threonine kinase activity	7	0.030442	-1.51653	cks2, ccnl1b, ccnt2b, ccnt2a, ccnl1a, cks1b, ccnq	3283	12	14912	2.64961	1	0.99845
GOTERM_BP	GO:0002040~sprouting angiogenesis	24	0.0327384	-1.48494	gas6, hspa12b, lgals2a, sdf4, loxl2a, abca1a, gng2, fbxw11b, cxcl12b, rtn4a, dre-mir-221, rspo3, rnf213a, tinagl1, kctd10, tnfrsf21, ano6, abcg1, cxcr4a, kdrl, dll4, cdh5, bmpr2a, vegfaa	3283	72	14912	1.51406	1	0.99845
GOTERM_BP	GO:0016559~peroxisome fission	4	0.0355853	-1.44873	dnm1l, pex11a, pex11b, pex11g	3283	4	14912	4.54219	1	0.99845
GOTERM_BP	GO:0021730~trigeminal sensory nucleus development	4	0.0355853	-1.44873	ackr3b, cxcl12a, cxcl12b, cxcr4b	3283	4	14912	4.54219	1	0.99845
GOTERM_BP	GO:0043137~DNA replication, removal of RNA primer	4	0.0355853	-1.44873	dna2, rnaseh2a, fen1, rnaseh1	3283	4	14912	4.54219	1	0.99845
GOTERM_BP	GO:0016573~histone acetylation	10	0.035999	-1.44371	trrap, crebbpa, kat2b, hat1, tada2a, ep300b, ing5a, kat2a, naa50, ing5b	3283	22	14912	2.06463	1	0.99845
GOTERM_BP	GO:0006413~translational initiation	20	0.0386024	-1.41339	eif6, ddx3a, eif3s6ip, eif4e3, eif3jb, eif1ad, eif2ak3, eif5a, eif4a1a, mtif2, eif4e1c, eif3ja, eif3k, eif1axb, eif1b, eif2s3, eif3ha, eif3m, eif3g, eif4ba	3283	58	14912	1.56627	1	0.99845
GOTERM_BP	GO:0006355~regulation of transcription, DNA-templated	315	0.0404094	-1.39352	CABZ01079241.1, nr1i2, pparg, mef2ca, myca, tsc22d3, nelfe, kat5b, setd1ba, phf20l1, sfpq, creb3l2, barx2, cnot3b, sin3b, mitfb, egr3, tfdp1a, thrab, mafb, irf5, foxj1b, l3mbtl1b, tp63, ccnl1a, E2F2, zmynd8, atf7b, rereb, cebpb, thap11, hif1al, mafk, pou6f1, creb5b, dlx5a, med30, rnf44, cdca7b, cdca7a, lrrfip1b, mkrn2, pou2f1b, elf3, pnrc2, mbtd1, tfdp2, uhrf1, meis1b, wt1b, irx6a, nfatc1, kat2a,…	3283	1310	14912	1.09221	1	0.99845
GOTERM_BP	GO:0007179~transforming growth factor beta receptor signaling pathway	11	0.0427006	-1.36957	smad9, smurf2, smad1, tgfb1b, smurf1, smad3b, SMAD4 (1 of many), smad6b, smad3a, smad6a, si:dkey-222b8.1	3283	26	14912	1.92169	1	0.99845
GOTERM_BP	GO:0032456~endocytic recycling	8	0.0431608	-1.36491	micall1b.2, vps52, ehd4, mical3a, ehd2a, rab13, micall1a, ehd2b	3283	16	14912	2.27109	1	0.99845
GOTERM_BP	GO:0031274~positive regulation of pseudopodium assembly	5	0.0461615	-1.33572	cdc42ep1a, cdc42ep3, zgc:154093, cdc42ep2, cdc42ep5	3283	7	14912	3.24442	1	0.99845
GOTERM_BP	GO:0007095~mitotic G2 DNA damage checkpoint	5	0.0461615	-1.33572	dtl, fanci, topbp1, mus81, chek1	3283	7	14912	3.24442	1	0.99845
GOTERM_BP	GO:0006672~ceramide metabolic process	5	0.0461615	-1.33572	ormdl2, ormdl3, asah2, acer2, acer3	3283	7	14912	3.24442	1	0.99845
GOTERM_BP	GO:0045880~positive regulation of smoothened signaling pathway	5	0.0461615	-1.33572	ugdh, ip6k2a, ift88, mycbp, gas8	3283	7	14912	3.24442	1	0.99845
GOTERM_BP	GO:0097535~lymphoid lineage cell migration into thymus	5	0.0461615	-1.33572	cxcl12a, ccl25b, tnnt2a, cxcl12b, ccr9a	3283	7	14912	3.24442	1	0.99845
GOTERM_BP	GO:0007099~centriole replication	5	0.0461615	-1.33572	cep135, sass6, cep63, si:dkey-243i1.1, plk4	3283	7	14912	3.24442	1	0.99845
GOTERM_BP	GO:0036297~interstrand cross-link repair	5	0.0461615	-1.33572	dclre1a, fan1, dclre1b, cenps, dclre1c	3283	7	14912	3.24442	1	0.99845
GOTERM_BP	GO:0019985~translesion synthesis	5	0.0461615	-1.33572	primpol, dtl, haus3, pcna, rev3l	3283	7	14912	3.24442	1	0.99845
GOTERM_BP	GO:0007076~mitotic chromosome condensation	5	0.0461615	-1.33572	smc2, ncapd3, ncapd2, ncapg, cdca5	3283	7	14912	3.24442	1	0.99845
GOTERM_BP	GO:0000723~telomere maintenance	7	0.0462236	-1.33514	pot1, xrcc6, dclre1b, terfa, rad50, rtel1, acd	3283	13	14912	2.44579	1	0.99845
GOTERM_BP	GO:0032508~DNA duplex unwinding	6	0.0479097	-1.31958	xrcc6, recql4, gins4, rad50, gins2, wrn	3283	10	14912	2.72531	1	0.99845
GOTERM_BP	GO:0034097~response to cytokine	6	0.0479097	-1.31958	junba, nfkb2, jund, jun, rel, june	3283	10	14912	2.72531	1	0.99845
GOTERM_BP	GO:0007020~microtubule nucleation	6	0.0479097	-1.31958	tubgcp2, tubg1, tubgcp4, tubgcp3, ndel1b, tubgcp5	3283	10	14912	2.72531	1	0.99845
GOTERM_BP	GO:0008360~regulation of cell shape	18	0.0495542	-1.30492	cdc7, palm2, cdc42ep1a, fmnl1a, fermt2, cdc42ep3, zgc:154093, cdc42se2, csnk1db, csnk1g2a, vrk2, myh10, brwd3, vrk3, vrk1, ppp1r12a, cdc42ep2, cdc42ep5	3283	52	14912	1.5723	1	0.99845
GOTERM_BP	GO:0043009~chordate embryonic development	37	0.0497972	-1.30279	npc1, igf1ra, rab18b, rps8a, ttpa, smtnl, rpl5a, rps4x, mcl1a, ctgfa, mcm5, rpl6, rps15, orc1, rps3a, rps7, ndufaf7, abcc6a, mcl1b, rpl28, atxn7, rpl35, tp53bp2b, rps19, sdccag8, nr3c1, ocrl, mtm1, foxo3b, agbl5, nbas, atp13a2, rps15a, rpl36a, slc41a1, pappab, mcu	3283	126	14912	1.33382	1	0.99845
GOTERM_BP	GO:0007368~determination of left/right symmetry	30	0.0545773	-1.26299	sesn1, ift57, aldh1a2, dnaaf1, tdp2b, bmpr2a, nog3, tsc1a, itgb1b, ahi1, atp1a1a.1, foxj1b, ift88, dmrt1, sgcd, fibpb, dnah7, ugdh, rfx2, bbs2, axin1, exoc5, dub, gpr22a, trib3, znf703, stk36, acvr1l, CABZ01055306.1, ccdc40	3283	99	14912	1.37642	1	0.99845
GOTERM_BP	GO:0016337~single organismal cell-cell adhesion	17	0.0562419	-1.24994	ctnna2, pkp2, pkp4, AMOTL1, pkp3a, vezt, si:ch211-74m13.1, ctnnd2a, si:ch211-74m13.3, ctnnd2b, fn1a, epcam, vcam1b, vsig8b, im:7151449, lama5, gpa33a, pkp1b	3283	49	14912	1.57586	1	0.99845
GOTERM_BP	GO:0009617~response to bacterium	12	0.0606362	-1.21727	cpt1b, cfbl, traf6, pcna, mpx, tlr3, hadhaa, cxcr3.2, mmp9, saa, cebpb, f5	3283	31	14912	1.75827	1	0.99845
GOTERM_BP	GO:0071466~cellular response to xenobiotic stimulus	12	0.0606362	-1.21727	smpd2a, ca2, tgfbi, tiparp, nqo1, atp6v0a1b, keap1a, nt5c2l1, adh8a, sort1b, hmox1a, zgc:77849	3283	31	14912	1.75827	1	0.99845
GOTERM_BP	GO:0007010~cytoskeleton organization	20	0.0620812	-1.20704	ablim1b, fmnl1a, epb41l3a, zranb1b, mical3a, fermt2, mical2b, ptk2ab, ablim1a, rp2, camsap1b, brwd3, si:ch211-266o15.1, dpysl2b, fmnl2a, blk, dmtn, zmym4, qrich1, si:ch211-173p18.3	3283	61	14912	1.48924	1	0.99845
GOTERM_BP	GO:0001568~blood vessel development	21	0.0634694	-1.19744	ilk, AMOTL1, ptprb, efnb2a, tnnt2a, ephb2a, stab2, mtmr8, egfl7, nf1a, kdr, angpt1, kdrl, has2, rcbtb1, twsg1a, pak2a, arhgef7b, hsp90ab1, vegfaa, lama1	3283	65	14912	1.46748	1	0.99845
GOTERM_BP	GO:0000077~DNA damage checkpoint	7	0.0662298	-1.17895	rad17, rad9a, cep63, atrip, si:ch73-352p4.5, pea15, tp53bp1	3283	14	14912	2.27109	1	0.99845
GOTERM_BP	GO:0030150~protein import into mitochondrial matrix	7	0.0662298	-1.17895	timm23a, TIMM21, tomm40l, pam16, timm17b, tomm40, grpel2	3283	14	14912	2.27109	1	0.99845
GOTERM_BP	GO:0007049~cell cycle	45	0.0698283	-1.15597	siah2l, lzts2a, mtus1a, cdc23, mcmbp, mis12, chfr, pelo, cep63, banp, cks1b, ncapd2, maea, zgc:63587, rbl2, tfdp2, uhrf1, zwilch, klhl21, ska1, mybl2b, rad17, kdm8, chaf1a, ccnd2a, tfdp1a, rbbp8, ndc80, arl8ba, cks2, PKN2 (1 of many), tp63, cdc45, ercc6l, prkcda, esco2, sass6, ccnd1, ttk, spdl1, cdc14aa, vrk1, sept3, haus6, lin54	3283	162	14912	1.26172	1	0.99845
GOTERM_BP	GO:0007266~Rho protein signal transduction	9	0.0704817	-1.15192	rock2b, tax1bp3, cdc42ep1a, cdc42ep3, phactr4a, zgc:154093, rhoab, cdc42ep2, cdc42ep5	3283	21	14912	1.94665	1	0.99845
GOTERM_BP	GO:0006809~nitric oxide biosynthetic process	4	0.0744812	-1.12795	klf2a, nos2a, tnnt2a, nos2b	3283	5	14912	3.63375	1	0.99845
GOTERM_BP	GO:0051415~interphase microtubule nucleation by interphase microtubule organizing center	4	0.0744812	-1.12795	tubgcp2, tubgcp4, tubgcp3, tubgcp5	3283	5	14912	3.63375	1	0.99845
GOTERM_BP	GO:0051591~response to cAMP	4	0.0744812	-1.12795	junba, jund, jun, june	3283	5	14912	3.63375	1	0.99845
GOTERM_BP	GO:0016574~histone ubiquitination	4	0.0744812	-1.12795	ube2a, ube2al, uhrf1, ube2nb	3283	5	14912	3.63375	1	0.99845
GOTERM_BP	GO:0007175~negative regulation of epidermal growth factor-activated receptor activity	4	0.0744812	-1.12795	zfyve28, zgpat, cblb, cbl	3283	5	14912	3.63375	1	0.99845
GOTERM_BP	GO:0045909~positive regulation of vasodilation	4	0.0744812	-1.12795	f2rl1.1, nos2a, f2rl1.2, nos2b	3283	5	14912	3.63375	1	0.99845
GOTERM_BP	GO:0006623~protein targeting to vacuole	5	0.0765319	-1.11616	vps13c, gosr2, vps13d, pik3r4, vti1b	3283	8	14912	2.83887	1	0.99845
GOTERM_BP	GO:0023051~regulation of signaling	5	0.0765319	-1.11616	cav1, cblb, cblc, cbl, lmo7a	3283	8	14912	2.83887	1	0.99845
GOTERM_BP	GO:0010941~regulation of cell death	5	0.0765319	-1.11616	junba, jund, jun, slc25a24, june	3283	8	14912	2.83887	1	0.99845
GOTERM_BP	GO:0006515~misfolded or incompletely synthesized protein catabolic process	5	0.0765319	-1.11616	oma1, lonp2, flj11011l, lonp1, yme1l1a	3283	8	14912	2.83887	1	0.99845
GOTERM_BP	GO:0009411~response to UV	5	0.0765319	-1.11616	primpol, dtl, rad18, perp, msh6	3283	8	14912	2.83887	1	0.99845
GOTERM_BP	GO:0031297~replication fork processing	5	0.0765319	-1.11616	cenps, mus81, tonsl, mms22l, wrn	3283	8	14912	2.83887	1	0.99845
GOTERM_BP	GO:0070493~thrombin receptor signaling pathway	5	0.0765319	-1.11616	f2r, f2rl2, f2rl1.1, f2rl1.2, si:dkey-163m14.2	3283	8	14912	2.83887	1	0.99845
GOTERM_BP	GO:0035058~nonmotile primary cilium assembly	5	0.0765319	-1.11616	arl13b, bbs2, ift57, ift88, cep126	3283	8	14912	2.83887	1	0.99845
GOTERM_BP	GO:0035025~positive regulation of Rho protein signal transduction	10	0.0788461	-1.10322	f2r, f2rl1.1, gpr35.1, gpr184, F2RL3, f2rl1.2, gpr55a, p2ry10, si:dkey-163m14.2, lpar6b	3283	25	14912	1.81687	1	0.99845
GOTERM_BP	GO:0009612~response to mechanical stimulus	8	0.0799075	-1.09741	junba, nfatc1, jund, jun, dlx5a, june, acp5b, tnfsf11	3283	18	14912	2.01875	1	0.99845
GOTERM_BP	GO:0043123~positive regulation of I-kappaB kinase/NF-kappaB signaling	8	0.0799075	-1.09741	mtdha, shrprbck1r, terf2ip, sharpin, ube2nb, brd4, edar, myd88	3283	18	14912	2.01875	1	0.99845
GOTERM_BP	GO:0045892~negative regulation of transcription, DNA-templated	28	0.0851487	-1.06982	id4, zgpat, lrrc14b, cops2, osr1, smad9, nab1b, cry1ab, her2, bhlhe40, men1, nab1a, bhlhe41, mecp2, loxl2a, smad1, thraa, pbxip1a, foxd3, tp63, zbtb14, mkxa, jarid2b, insm1a, znf703, sox21a, puraa, nelfb	3283	95	14912	1.33875	1	0.99845
GOTERM_BP	GO:0007596~blood coagulation	15	0.0859384	-1.06581	tfpia, vwf, f2rl1.2, f3a, f2r, tmprss4b, f2rl2, pdgfbb, ano6, f2rl1.1, proza, f8, itga2b, si:dkey-163m14.2, f5	3283	44	14912	1.54847	1	0.99845
GOTERM_BP	GO:0006351~transcription, DNA-templated	181	0.0870066	-1.06045	znf367, nr1i2, pparg, mef2ca, pou2f3, myca, tcea2, pcgf5b, kdm5bb, pparda, setd1ba, maff, bhlhe40, creb3l2, prim1, mitfb, hoxa10b, egr3, tfdp1a, thrab, mafb, smad1, foxj1b, tp63, foxo1b, E2F2, mgaa, nrf1, cebpb, thap11, mad2l2, mafk, hif1al, ccnl1b, ccnd1, egr1, setdb1a, pou6f1, tefm, suz12b, med30, hoxd10a, phf2, tbx15, jun, dpf3, mafba, mkrn2, pou2f1b, pnrc2, osr1, tfdp2, stat3, uhrf1, sox19b, …	3283	747	14912	1.10058	1	0.99845
GOTERM_BP	GO:0030968~endoplasmic reticulum unfolded protein response	9	0.0901861	-1.04486	uggt1, edem2, SERP1, edem3, creb3l2, serp1, creb3l1, creb3l3b, rnf175	3283	22	14912	1.85817	1	0.99845
GOTERM_BP	GO:0048793~pronephros development	20	0.0938973	-1.02735	tsc1a, etv5b, tnnt2a, aldh1a2, pard6gb, rp2, osr1, cdh6, triap1, wt1b, dnaaf1, exoc5, six2a, ift172, slc41a1, wnt5a, igf2b, ccdc40, vegfaa, nog3	3283	64	14912	1.41943	1	0.99845
GOTERM_BP	GO:0042981~regulation of apoptotic process	47	0.0942785	-1.02559	mitfa, casp8l2, rassf2a, gdf6a, dnaja3b, sgk1, adgrg1, rbm10, ripk2, card11, traf6, inhbab, gdf10a, mcl1a, gbp4, mcl1b, inhbaa, bcl2l13, dedd, mitfb, pak2a, nod1, bcl2l10, cflara, acin1b, gbp3, relt, traf3, pkz, prnprs3, si:dkey-23c22.5, si:dkey-10c21.1, bcl10, pea15, traf4a, inhbb, si:ch211-195b13.1, traf2a, tgfb1b, TMEM102, card9, bmp7b, perp, si:cabz01036022.1, ngfrb, cd40, zgc:194469	3283	174	14912	1.22691	1	0.99845
GOTERM_BP	GO:0006139~nucleobase-containing compound metabolic process	13	0.0947521	-1.02341	brip1, bpnt1, pnp5b, mettl14, ercc2, rtel1, ak4, wrn, dck, ak3, zgc:110540, ak8, pnp5a	3283	37	14912	1.5959	1	0.99845
GOTERM_BP	GO:0051482~positive regulation of cytosolic calcium ion concentration involved in phospholipase C-activating G-protein coupled signaling pathway	10	0.097982	-1.00885	f2r, f2rl1.1, gpr35.1, gpr184, F2RL3, f2rl1.2, gpr55a, p2ry10, si:dkey-163m14.2, lpar6b	3283	26	14912	1.747	1	0.99845

## Sheet: GO-BP_7dpa
Category	Term	Count	PValue	log10(Pvalue)	Genes	List.Total	Pop.Hits	Pop.Total	Fold.Enrichment	Benjamini	FDR
GOTERM_BP	GO:0006412~translation	208	1.02341e-28	-27.99	mrpl13, rps18, ucp2, mrps17, larsb, rpl27, rpl28, nhp2, guf1, rpl29, rps14, eif3ha, rps21, rpl18, mrpl17, slc25a5, gars, mrpl37, eif3d, yars2, rps13, rps2, rpl22l1, mrpl11, tufm, rpl34, mrpl16, eif4a1b, rps11, pelo, rps27.2, ell, tsfm, slc25a25a, eif2ak3, eif4e2, rpl26, rpl30, rpl32, eef2b, vars, eif2s2, eif4ebp2, rpl38, slc25a29, slc25a1a, eif3ba, mrps18b, eif3c, slc25a11, rps28, rpl22, eif1axb,…	5288	314	14912	1.86801	3.25546e-25	3.23397e-25
GOTERM_BP	GO:0006364~rRNA processing	53	5.09443e-15	-14.2929	utp15, gnl3l, tbl3, exosc6, wdr55, tsr3, mrto4, mphosph10, gemin4, nhp2, krr1, si:ch211-217k17.7, heatr1, gar1, wdr12, rrp7a, bms1, wdr36, nop2, mdn1, ncl, rrp15, ddx56, mrm3a, nol6, pop4, rrp1, nop10, rps6, dcaf13, rpf1, tfb2m, imp4, ebna1bp2, tsr2, dimt1l, sbds, ftsj3, rps7, si:dkey-251i10.3, rrp9, dis3l2, utp11l, c1d, nat10, dkc1, dis3, nol11, bop1, pes, ybey, fbl, rrp36	5288	62	14912	2.41062	8.10269e-12	8.0492e-12
GOTERM_BP	GO:0042254~ribosome biogenesis	42	5.86991e-11	-10.2314	dcaf13, rpf1, rps18, dlx2a, rpl34, eif6, wdr43, kri1, sbds, urb2, ftsj3, tsr3, mrpl36, mrto4, mphosph10, eral1, noa1, mrpl10, nhp2, krr1, heatr1, snu13b, naf1, rpl7a, gar1, wdr12, noc4l, rplp0, gnl1, bms1, tsr1, bop1, nip7, rrs1, pes, nom1, lsg1, rcl1, pwp2h, nop10, riox2, rrp36	5288	51	14912	2.32233	5.12573e-08	5.09189e-08
GOTERM_BP	GO:0015031~protein transport	114	6.44543e-11	-10.1907	sec23a, ap1m1, ndc1, ap2a1, snx18b, sec61a1l, gle1, gosr2, snx9b, arcn1b, sec31a, sec61g, snx33, sec22ba, timm8a, unc119.1, nup93, chmp1b, arcn1a, cplane2, ap2m1b, chmp4bb, atg4da, sec24b, vps25, copa, stx18, chmp2a, ap1g1, kpna6, vps18, kpna3, chmp3, copz2, timm10b, ap1s3b, cep41, snx9a, gdi2, sar1b, ktn1, copg2, nup85, eny2, copb1, scamp2l, rp2, hook1, sec24d, pam16, rab13, lsg1, sec24c, sar1ab…	5288	194	14912	1.6571	5.12573e-08	5.09189e-08
GOTERM_BP	GO:0006888~ER to Golgi vesicle-mediated transport	43	5.17284e-08	-7.28627	stx17, zgc:63863, sec23b, uso1, sec23a, tex261, rab1ab, stx5al, lman2, rab1aa, vti1b, mppe1, spast, copb2, gosr2, sec22c, klhl12, lman1, lman2lb, sec24a, ddhd2, sec22ba, sec22a, copb1, stx5a, cope, bcap31, yif1b, nrbp2b, sec24d, sec24b, cog3, rab1ba, ier3ip1, si:dkey-9k7.3, sec23ip, copa, stx18, sec24c, rab35b, sec13, nrbp2a, yif1a	5288	60	14912	2.02098	3.29096e-05	3.26923e-05
GOTERM_BP	GO:0000398~mRNA splicing, via spliceosome	54	6.76413e-08	-7.16979	zcrb1, si:ch1073-335m2.2, snrnp35, bcas2, hnrnpm, sf3b6, sf3b5, u2af1, prpf31, aqr, snrpc, sf1, sf3a3, snrpb, raver1, sart1, snrpg, nono, raver2, lsm8, prpf40a, sf3b2, prpf8, dhx8, cwc22, snrpf, snrpa1, htatsf1, ddx46, snrpa, smn1, phf5a, ddx39aa, pspc1, bud31, snrpe, prpf3, dhx38, rbm15b, spen, snu13b, helb, lsm5, dhx15, txnl4a, snw1, snrpb2, prpf4, sart3, lsm6, txnl4b, ddx39ab, lsm7, sf3b3	5288	82	14912	1.85705	3.58612e-05	3.56244e-05
GOTERM_BP	GO:0006886~intracellular protein transport	114	4.54748e-07	-6.34223	stam2, sec23a, ap1m1, ap2a1, stx2b, snx9b, vps16, ipo4, gga3, cd74b, sec61g, snx33, tbc1d14, tbc1d12b, stx12, ap2m1b, stx10, xpo7, snx5, hgs, ipo13, grtp1a, sec24b, cog3, si:dkey-9k7.3, tnpo2, si:dkey-238d18.4, copa, stx18, vps11, si:dkeyp-19e1.3, cltb, snx11, ap1g1, cltca, vps18, vti1b, pcf11, vps39, ap1s3b, ldlrb, ramp2, snx1b, copb2, stx7l, snx9a, ipo7, sar1b, cltcb, copg2, tbc1d25, stx3a, rph…	5288	218	14912	1.47466	0.000206651	0.000205286
GOTERM_BP	GO:0006413~translational initiation	40	8.07952e-07	-6.09261	EIF1B, eif6, ddx3a, eif1axa, eif2a, eif3s6ip, eif4a1b, eif4e3, ddx3b, eif3jb, abce1, eif2ak3, eif3ea, eif4e2, eif4bb, eif4a1a, eif4e1c, eif2b1, eif4enif1, eif3ha, eif2s1a, eif3f, eif4ebp2, eif2s2, eif5, eif4ea, eif3d, eif3ba, eif5a, eif3c, eif4eb, eif3ja, eif2b3, eif1axb, eif1b, eif4e2rs1, eif2s3, denr, brf1a, eif3m	5288	58	14912	1.94481	0.000321262	0.000319141
GOTERM_BP	GO:0006606~protein import into nucleus	28	1.48934e-06	-5.82701	nup153, nup88, kpna6, kpna3, pom121, nup107, nup155, cse1l, nup133, rae1, tprb, ipo7, ran, nup188, tpra, ranbp1, tnpo3, nup93, nup85, kpna1, ipo13, pttg1ipb, snupn, heatr3, nup50, nup98, nup58, kpna4	5288	36	14912	2.19331	0.000526399	0.000522924
GOTERM_BP	GO:0000462~maturation of SSU-rRNA from tricistronic rRNA transcript (SSU-rRNA, 5.8S rRNA, LSU-rRNA)	22	8.58321e-06	-5.06635	heatr1, utp6, ngdn, dcaf13, rps8a, mrps11, noc4l, utp3, tbl3, rps16, mrps9, tsr2, bms1, tsr1, rps24, wdr3, wdr46, utp25, pwp2h, rps14, krr1, rrp36	5288	27	14912	2.29775	0.00273032	0.00271229
GOTERM_BP	GO:0016192~vesicle-mediated transport	83	1.13277e-05	-4.94586	stxbp1a, zgc:92912, sec23a, ap1m1, stx5al, ap2a1, stx1b, rab11fip3, mppe1, trip10a, stxbp3, stx2b, CACFD1, vps45, golt1bb, gga3, sec31a, klhl12, sec22ba, stx12, ap2m1b, ergic3, stx10, mon1a, stx11a, scfd1, clint1a, stx11b.1, kif16ba, stx18, copa, sft2d1, chmp1a, vps11, stx17, ap1s1, cltb, ap1g1, cltca, vps18, nck1b, fnbp1l, kdelr2a, yipf5, tvp23b, vti1b, ap1s3b, vps39, ap1m3, copb2, copz1, stx7l,…	5288	157	14912	1.49081	0.00327576	0.00325413
GOTERM_BP	GO:0000028~ribosomal small subunit assembly	15	2.64205e-05	-4.57806	rps17, zgc:114188, mrps11, rrp7a, rps5, rps27.2, rpsa, rps15, mrps7, eral1, rps28, pwp2h, rps10, rps14, rps19	5288	16	14912	2.64372	0.00700363	0.00695739
GOTERM_BP	GO:0001522~pseudouridine synthesis	14	6.56386e-05	-4.18284	pus3, pusl1, naf1, trub2, pus1, gar1, dkc1, pus10, rpusd4, rpusd2, nop10, pus7, rpusd1, pus7l	5288	15	14912	2.63197	0.0158263	0.0157218
GOTERM_BP	GO:0043009~chordate embryonic development	67	6.96535e-05	-4.15706	npc1, sumo3a, rab18b, auts2a, hsp70.1, rpl5a, pitpnaa, ctgfa, rab18a, rpl6, rps15, orc1, pdcd10a, rps3a, rpl28, atxn7, rbm22, ids, rps14, opa1, rps19, myb, sdccag8, ocrl, vcp, gata1a, upf1, rps15a, rpl36a, slc41a1, igf1rb, smg5, mob1a, rps8a, smtnl, sumo1, rps4x, gne, hip1, ambra1b, rps7, tp53bp2a, mtmr14, pdcd10b, mcl1b, rps29, rpl35, eef2b, rps3, cul2, tp53bp2b, chd7, nr3c1, insra, rplp0, foxo3…	5288	126	14912	1.49951	0.0158263	0.0157218
GOTERM_BP	GO:0006890~retrograde vesicle-mediated transport, Golgi to ER	15	0.000100476	-3.99794	rab41, arcn1a, copb1, cope, tmem115, cog4, dnajc28, cog3, copb2, copa, stx18, rab6a, rab6bb, arcn1b, cog7	5288	17	14912	2.48821	0.0205238	0.0203883
GOTERM_BP	GO:0015986~ATP synthesis coupled proton transport	20	0.000103232	-3.98619	tcirg1b, atp5pd, atp5mc1, atp5mc3b, atp5f1e, atp5mea, atp5f1c, mt-atp6, atp5po, atp5f1b, atp5pf, atp5pb, mt-atp8, atp6v0a1a, atp5mc3a, atp6v0a2b, atp5meb, atp5l, atp5f1d, atp5fa1	5288	26	14912	2.16921	0.0205238	0.0203883
GOTERM_BP	GO:0006511~ubiquitin-dependent protein catabolic process	58	0.00011654	-3.93352	usp20, si:dkey-82j4.2, chfr, cops3, usp49, usp14, uba7, cul1b, psma4, cul5b, cylda, usp10, psma1, cul3a, uba1, usp43a, psmd4b, usp9, usp19, ube2h, bag6l, ube2g1a, psma5, usp13, fbxo32, usp37, cul3b, psmd3, psma8, usp44, usp30, uchl1, psma3, psmd11b, usp42, elocb, ube2g1b, uchl5, cul4b, usp4, ranbp1, si:rp71-45k5.4, skp1, cul2, psma6b, psmd11a, usp45, psma6a, fbxo25, usp33, usp2a, usp2b, adrm1, us…	5288	107	14912	1.52858	0.0218067	0.0216628
GOTERM_BP	GO:0043161~proteasome-mediated ubiquitin-dependent protein catabolic process	49	0.000128787	-3.89013	ube2a, klhl11, ube2al, rnf126, psmb3, rlim, sharpin, zgc:175214, znrf1, rmnd5b, si:ch211-81a5.1, psmd7, ube2kb, klhl20, btbd2a, flj11011l, rnf139, psmd4b, psmd12, rnf181, vcp, btbd3a, plaa, psma5, btbd6a, cdc34a, shrprbck1r, ube2r2, rad23ab, btbd9, nsfl1c, rnf44, CABZ01113954.1, fbxw5, psmd6, psmd8, rnf6, rnf111, psmd2, psmd1, rad23b, stub1, spop, crbn, psmc5, abtb1, si:ch211-59o9.10, rnf145a, kl…	5288	87	14912	1.58826	0.0227596	0.0226093
GOTERM_BP	GO:0002181~cytoplasmic translation	18	0.000193535	-3.71324	rpl31, rplp0, rpl9, eif3jb, rpl15, rpl6, mrto4, rpl36, rpl7l1, eif4bb, rpl26, rpl7, eif3ja, eif4h, rpl22, rpl35a, rpl8, rpl29	5288	23	14912	2.20693	0.0324019	0.032188
GOTERM_BP	GO:0006457~protein folding	62	0.000208197	-3.68153	dnaja3b, tmx1, zgc:122979, cct3, aipl1, calr3b, trap1, dnaja3a, dnajb11, nudc, ppih, fkbp5, si:ch211-274f20.2, txnl1, aip, grpel2, cct2, ppwd1, dnaja2, ppig, cct6a, fkbp9, RANBP2, pfdn4, qsox2, cct4, pfdn5, tmx4, txndc5, p4hb, pfdn6, ppid, fkbp7, ppifb, hspa9, cdc37l1, cct5, hspe1, fkbp8, fkbp16, hspd1, ppil3, ppiaa, cct8, zgc:56493, pdia2, fkbp1aa, txndc11, tcp1, nktr, grpel1, canx, cct7, pdia6,…	5288	118	14912	1.48168	0.0331137	0.0328951
GOTERM_BP	GO:0006418~tRNA aminoacylation for protein translation	25	0.000253562	-3.59592	hars, pars2, mars2, larsb, iars, nars, eprs, cars, CABZ01109604.1, aimp1, wars2, qars, yars, iars2, cars2, vars, gars, sars, rars, tars, yars2, mars, dalrd3, rars2, kars	5288	37	14912	1.90538	0.0384086	0.0381551
GOTERM_BP	GO:0006396~RNA processing	39	0.000298686	-3.52479	zgc:163098, dhx9, trub2, pdcd11, dhx57, si:ch211-114c17.1, exosc8, snrpd1, rbm8a, dhx30, rtcb, xab2, utp6, trmt2a, dhx33, dkc1, sfswap, ccnl1a, snrpd3l, adat1, grsf1, mrpl44, dicer1, cherp, crnkl1, rtca, sf3a1, sart3, tdrd9, larp7, exosc9, mrm3a, ccnl1b, prpf39, rcl1, ssb, lsm7, exosc10, trmt2b	5288	67	14912	1.64147	0.0431872	0.0429021
GOTERM_BP	GO:0008033~tRNA processing	33	0.00047528	-3.32305	pus3, ctu2, gtpbp3, thg1l, urm1, rpp30, trmu, dus4l, wdr4, qtrt2, elac2, tyw3, trmt1, rtcb, pus7l, pusl1, osgepl1, nat10, pus1, trmt12, qtrt1, rpp21, ctu1, CU929199.1, tsen2, cdkal1, trmt13, rpp14, trpt1, pop4, trmt2b, dus2, trit1, fbl	5288	55	14912	1.69198	0.0657333	0.0652993
GOTERM_BP	GO:0009451~RNA modification	13	0.000545577	-3.26314	pus3, pusl1, trub2, pus1, dkc1, pus10, cdk5rap1, rpusd4, cdkal1, rpusd2, pus7, rpusd1, pus7l	5288	15	14912	2.44397	0.0723116	0.0718342
GOTERM_BP	GO:0000027~ribosomal large subunit assembly	14	0.000674685	-3.1709	rpl3, rpf1, ppan, rpl5a, mrpl20, rpf2, mdn1, rpl23a, rpl6, mrto4, rpl12, mrpl11, bxdc2, rpl10	5288	17	14912	2.32233	0.0858469	0.0852801
GOTERM_BP	GO:0016485~protein processing	26	0.00123483	-2.90839	tysnd1, atg4b, uqcrc1, furina, aph1b, pcsk1, rhbdf1a, parla, rhbdf1b, uqcrc2a, pitrm1, cpm, atg4db, metap2b, pmpcb, cpda, uqcrc2b, atg4c, pcsk2, nrd1a, psen1, rhbdl3, atg4da, ide, lonp2, rhbdl2	5288	42	14912	1.7457	0.142222	0.141283
GOTERM_BP	GO:0030150~protein import into mitochondrial matrix	12	0.0012458	-2.90455	grpel1, timm23a, TIMM21, timm50, tomm40l, pam16, timm17b, tomm22, tomm40, grpel2, timm44, tomm7	5288	14	14912	2.41712	0.142222	0.141283
GOTERM_BP	GO:0051726~regulation of cell cycle	36	0.00125188	-2.90244	tsc1b, gadd45ba, rps18, rps8a, lin9, jun, cables1, june, rbl2, rbl1, rps7, ssrp1a, rb1, rps29, phactr4b, tsc2, rpl35, rgcc, ccnf, cables2a, ccng1, si:dkey-67c22.2, si:dkey-27i16.2, cables2b, bop1, rpl23a, dot1l, pes, rpl36, rps15a, rpl13, rpl7, mdka, rpl36a, jund, gadd45ga	5288	64	14912	1.58623	0.142222	0.141283
GOTERM_BP	GO:0006351~transcription, DNA-templated	305	0.00132902	-2.87647	pou4f1, chd8, nr1i2, pparg, mef2ca, srebf2, supt6h, setd1ba, casz1, asf1bb, polr2b, med25, nr1d2b, polr2c, creb3l2, e2f8, polr2d, purbb, egr3, pax7a, mcts1, hsf1, thrab, mafb, tceanc2, foxj1b, cnot8, hnf4a, tp63, rxrgb, gtf2h1, nfil3, sox1b, thap11, nr5a2, hif1al, bzw1a, pou6f1, med30, kmt5b, nfe2l1b, gpbp1l1, leo1, plagl2, rxrba, ino80, mkrn2, pou2f1b, scai, nfixb, ezh2, supt5h, rtraf, ccnt1, sr…	5288	747	14912	1.15139	0.14578	0.144817
GOTERM_BP	GO:0051028~mRNA transport	18	0.00180089	-2.74451	casc3, qkia, nup93, nup85, lrmp, eny2, ndc1, ncbp3, thoc7, nxt2, thoc5, gle1, nup35, magoh, igf2bp3, eif4a3, thoc6, rbm8a	5288	26	14912	1.95229	0.190954	0.189693
GOTERM_BP	GO:0045116~protein neddylation	10	0.00225468	-2.64691	dcun1d1, rnf7, dcun1d3, rbx1, dcun1d5, dcun1d2b, dcun1d2a, uba3, nae1, dcun1d4	5288	11	14912	2.56361	0.231359	0.229832
GOTERM_BP	GO:0030838~positive regulation of actin filament polymerization	11	0.00279905	-2.55299	cdc42ep1a, cdc42ep4a, baiap2a, cdc42ep3, zgc:154093, cdc42ep4b, baiap2l2a, cdc42ep2, baiap2l1b, cdc42ep5, baiap2b	5288	13	14912	2.38613	0.269811	0.26803
GOTERM_BP	GO:0006122~mitochondrial electron transport, ubiquinol to cytochrome c	11	0.00279905	-2.55299	uqcrc2b, uqcrb, uqcrc1, cycsb, uqcrc2a, uqcrh, uqcr10, cyc1, uqcrq, pmpcb, mt-cyb	5288	13	14912	2.38613	0.269811	0.26803
GOTERM_BP	GO:0015992~proton transport	20	0.00295426	-2.52955	tcirg1b, atp5mc1, atp6v0d1, atp5mc3b, atp6v1b2, atp5f1c, mt-atp6, nnt, atp5f1b, atp5pf, atp6v1c1b, mt-atp8, atp6v0a1a, atp6v1ba, atp5mc3a, atp6v0a2b, atp6v0ca, atp6v1aa, tcirg1a, atp5fa1	5288	31	14912	1.81934	0.276397	0.274572
GOTERM_BP	GO:0006414~translational elongation	19	0.00311601	-2.5064	tcea3, tufm, eef1a2, tcea1, eef1g, tcea2, gtpbp1, gtpbp2b, eef1b2, eef1a1l1, ell, calcoco1b, tsfm, eef1a1a, gfm1, eftud2, eef2b, eef2a.1, eef2k	5288	29	14912	1.84757	0.280229	0.278379
GOTERM_BP	GO:0042273~ribosomal large subunit biogenesis	12	0.00317141	-2.49875	heatr3, znf622, rpl26, wdr74, ebna1bp2, surf6, nop16, rpl35a, wdr55, noc2l, rrs1, nip7	5288	15	14912	2.25598	0.280229	0.278379
GOTERM_BP	GO:0006281~DNA repair	78	0.0033935	-2.46935	ube2a, smc5, ube2al, smarcad1b, mgmt, bccip, rpa1, mtor, neil3, slx4, mms19, mms22l, rad1, ercc3, NABP2, prmt6, poll, recql, rad17, rad52, smc6, chaf1a, fanci, flj11011l, pds5b, cry5, ercc4, vcp, exo5, gtf2h1, ercc5, alkbh3, unga, dot1l, ino80e, trip12, sprtn, rpa2, nabp1a, ruvbl1, slx1b, actr8, poli, ruvbl2, wrnip1, alkbh1, rev1, cenpx, ino80, fancc, xrcc5, tdg.1, dclre1b, psme4a, mus81, polk, n…	5288	168	14912	1.30927	0.284419	0.282541
GOTERM_BP	GO:0000470~maturation of LSU-rRNA	13	0.00339764	-2.46882	rsl1d1, snu13b, rpf1, rpl7a, eif6, nsa2, wdr12, rpl10a, nop2, mak16, rrp15, nhp2, mrpl1	5288	17	14912	2.15645	0.284419	0.282541
GOTERM_BP	GO:0000463~maturation of LSU-rRNA from tricistronic rRNA transcript (SSU-rRNA, 5.8S rRNA, LSU-rRNA)	8	0.00387759	-2.41144	pes, ftsj3, rpl7l1, wdr12, rpl7, rpf2, rpl35, bop1	5288	8	14912	2.81997	0.316272	0.314184
GOTERM_BP	GO:0030490~maturation of SSU-rRNA	9	0.00527019	-2.27817	nob1, tsr3, srfbp1, snu13b, lsm6, si:dkey-251i10.3, mphosph10, rps28, nol11	5288	10	14912	2.53797	0.408889	0.40619
GOTERM_BP	GO:0006405~RNA export from nucleus	9	0.00527019	-2.27817	nup153, nup133, rae1, nup62l, nup188, pom121, ranbp1, nup98, nup155	5288	10	14912	2.53797	0.408889	0.40619
GOTERM_BP	GO:0006417~regulation of translation	24	0.00544296	-2.26416	tarbp2, casc3, ngdn, qkia, mif4gda, eif2a, eif4e3, eif4ea, ddx6, eif4ebp3l, ago4, magoh, igf2bp3, ptcd3, ago3b, cnot1, eif4a3, cnot11, cnot7, ddx61, gcn1, cnot9, rbm8a, eif3ha	5288	41	14912	1.65071	0.41224	0.409518
GOTERM_BP	GO:0008299~isoprenoid biosynthetic process	10	0.00617181	-2.20959	pdss2, pdss1, hmgcra, mvda, mvk, fdps, ggps1, hmgcrb, idi1, hmgcs1	5288	12	14912	2.34997	0.438125	0.435232
GOTERM_BP	GO:0043044~ATP-dependent chromatin remodeling	10	0.00617181	-2.20959	actl6a, smarca5, smarcad1b, smarca4a, smarce1, smarcc1a, smarcad1a, smarca1, smarcc1b, smarcb1a	5288	12	14912	2.34997	0.438125	0.435232
GOTERM_BP	GO:0045892~negative regulation of transcription, DNA-templated	47	0.00619793	-2.20775	id3, basp1, id2b, rxrba, e2f7, lrrc14b, mphosph8, cry1bb, osr1, rxrbb, nab1b, cry1ab, prmt6, bhlhe40, id1, cipcb, men1, nab1a, hey2, e2f8, rb1, tshz3a, dmap1, bhlhe41, pbxip1b, purbb, mecp2, loxl2a, smad1, thraa, pbxip1a, foxd3, tp63, zbtb14, gclc, cry1aa, hif1ab, mkxa, jarid2b, daxx, purba, runx1t1, sox21a, riox2, zbtb4, ruvbl2, nelfb	5288	95	14912	1.39514	0.438125	0.435232
GOTERM_BP	GO:0006397~mRNA processing	53	0.00690601	-2.16077	zcrb1, ptbp1a, bcas2, celf1, prpf31, esrp1, prpf38a, khdrbs2, hnrnpl2, eif4a3, rbm22, tfip11, prpf38b, aurkaip1, ncbp3, srsf1a, zc3h14, magoh, rbm25b, hnrnpl, cmtr1, CABZ01059915.1, cwc22, snrpf, rbm26, pan2, ddx46, qkia, smn1, fip1l1b, cstf1, pdcd11, supt5h, snrpe, cpsf6, u2af2b, ern2, prpf3, celf3a, rbm8a, casc3, srrm1, puf60b, si:dkey-67c22.2, smndc1, thoc7, thoc5, sart3, rbm27, lsm6, prpf39, …	5288	110	14912	1.35871	0.477565	0.474413
GOTERM_BP	GO:0016569~covalent chromatin modification	42	0.00795892	-2.09915	chd8, phf2, hdac4, smarcad1b, dnajc2, suz12a, banp, dpf3, hdac9b, ing5a, asf1bb, setd1ba, ezh2, prmt6, setd3, carm1, rbb4l, hdac3, brd4, waca, prmt7, hdac1, loxl2a, eny2, kansl3, hdac5, rbbp4, smarcad1a, aebp2, bag6l, si:dkeyp-118b1.2, eed, dot1l, jarid2b, ing2, bmi1a, emsy, brdt, atxn7l3, setd7, anp32e, kmt5b	5288	84	14912	1.40998	0.533046	0.529527
GOTERM_BP	GO:0006633~fatty acid biosynthetic process	24	0.00804345	-2.09456	msmo1, acaca, fam213b, hsd17b12a, agmo, acsm3, sc5d, elovl6, elovl1a, fa2h, aclya, ndufab1a, hacd3, scd, elovl8b, ptgesl, elovl1b, acacb, hsd17b12b, fads2, mlycd, ch25h, mecr, elovl6l	5288	42	14912	1.61141	0.533046	0.529527
GOTERM_BP	GO:0008380~RNA splicing	33	0.0087781	-2.0566	zcrb1, ddx46, qkia, smn1, rbm10, bcas2, celf1, snrpe, prpf31, esrp1, prpf38a, snrpd2, eif4a3, thrap3a, rbm22, rbm8a, casc3, tfip11, puf60b, prpf38b, smndc1, thoc7, thoc5, srsf1a, sart3, magoh, prpf39, lsm6, thoc6, CABZ01059915.1, cwc22, snrpf, sf3b3	5288	63	14912	1.47713	0.56986	0.566098
GOTERM_BP	GO:0042274~ribosomal small subunit biogenesis	7	0.00966396	-2.01484	nob1, rps7, nat10, surf6, rps6, ltv1, utp11l	5288	7	14912	2.81997	0.602766	0.598787
GOTERM_BP	GO:0031274~positive regulation of pseudopodium assembly	7	0.00966396	-2.01484	cdc42ep1a, cdc42ep4a, cdc42ep3, zgc:154093, cdc42ep4b, cdc42ep2, cdc42ep5	5288	7	14912	2.81997	0.602766	0.598787
GOTERM_BP	GO:0032543~mitochondrial translation	16	0.0105718	-1.97585	mrps16, ptrh1, gatc, hars, mrpl16, mrpl47, mrps17, mrps24, mrps7, ptcd3, mrpl57, rars2, mrps18c, gatb, chchd1, mrpl10	5288	25	14912	1.80478	0.64585	0.641586
GOTERM_BP	GO:0006897~endocytosis	39	0.0107608	-1.96816	lmbr1l, usp20, snx11, zgc:100846, epn3a, fnbp1l, rab5ab, snx18b, csnk1db, snx4, csnk1g2a, snx12, trip10a, hip1, snx1b, snx9a, snx9b, gtf2a1l, ap2m1b, snx33, snx1a, pip5k1ab, itsn2b, ocrl, ap2m1b, ap1b1, snx3, snx5, usp33, wipf2b, fnbp1a, dnm2a, ston2, snx6, epn2, rabep2, csnk1g2b, pstpip1a, csnk1g1	5288	78	14912	1.40998	0.64585	0.641586
GOTERM_BP	GO:0007034~vacuolar transport	13	0.0127561	-1.89428	chmp4c, ndfip2, chmp1b, atp6v0d1, chmp4bb, chmp3, chmp5b, cln3, chmp1a, ndfip1, chmp2bb, chmp6b, chmp2a	5288	19	14912	1.92945	0.751427	0.746466
GOTERM_BP	GO:0046513~ceramide biosynthetic process	12	0.0133275	-1.87525	zgc:91976, cers1, smpd2a, SAMD8, cers4b, cers2b, sgms2b, degs2, cers6, degs1, cers2a, cers3b	5288	17	14912	1.99057	0.770812	0.765723
GOTERM_BP	GO:0007264~small GTPase mediated signal transduction	128	0.0138457	-1.85868	dock4b, rhot1a, rab41, rerglb, rhobtb1, mfhas1, rabl3, rab1aa, rab8a, rabl2, rap2c, arl4ca, rac1a, rgl2, rapgefl1, rit1, cplane2, rapgef5a, rab24, arl4ab, rab11ba, rab8b, cdc42l, si:dkeyp-59c12.1, bcar3, rab27a, arf6b, rab35b, arfrp1, vav3b, rasgrp3, rhof, rasef, rab7, zgc:55558, dock7, sos2, ralba, nras, zgc:171927, gdi2, arf6a, sh2d3ca, rab43, cdc42l2, rasgef1ba, rab14, arhgap32a, rab2a, rab44,…	5288	305	14912	1.18346	0.786488	0.781296
GOTERM_BP	GO:0060216~definitive hemopoiesis	21	0.0156222	-1.80626	sumo3a, myb, ddx46, gfi1b, hsp70l, gar1, sumo1, eaf1, dkc1, kri1, gata1a, rps24, meis1b, rpl22l1, cpsf1, znf574, pbx1a, gata2b, sae1, metap2b, ube2ia	5288	37	14912	1.60052	0.856796	0.85114
GOTERM_BP	GO:0010501~RNA secondary structure unwinding	21	0.0156222	-1.80626	ddx46, ddx54, ddx3a, ddx59, eif4a1b, ddx39aa, ddx6, ddx3b, ddx55, ddx19, ddx56, ddx24, ddx5, eif4a3, ddx39ab, ddx27, ddx42, ddx61, ddx1, ddx49, ddx18	5288	37	14912	1.60052	0.856796	0.85114
GOTERM_BP	GO:0006099~tricarboxylic acid cycle	15	0.0184287	-1.7345	mdh2, suclg1, sdhb, idh1, idh3g, ogdha, fh, sdha, aco2, dlst, ogdhb, sdhc, idh3a, cs, sdhdb	5288	24	14912	1.76248	0.97703	0.97058
GOTERM_BP	GO:0001878~response to yeast	15	0.0184287	-1.7345	nsdhl, traf3, sc5d, hip1, orc1, psmd14, hspa5, cyp51, nap1l1, ppp6c, atp6v0ca, cyb5r2, mcm4, pank1a, zgc:77112	5288	24	14912	1.76248	0.97703	0.97058
GOTERM_BP	GO:0031101~fin regeneration	33	0.019811	-1.70309	krt17, hspa9, smarca4a, krt5, hspd1, serpinh1b, cxcl12a, inhbaa, nrg1, hspa8, rbb4l, vdac2, hdac1, dre-mir-203a, rbbp4, fynb, scfd1, prdx5, anxa1a, acvr1ba, agr1, chd4a, axin1, mta2, krt91, hapln1a, erbb3b, yap1, igf1rb, igf2b, kdm6bb, mtrex, gata3	5288	66	14912	1.40998	1	0.993711
GOTERM_BP	GO:0006631~fatty acid metabolic process	22	0.0199775	-1.69946	cryl1, fam213b, aasdh, elovl6, elovl1a, fa2h, hadhab, ndufab1a, hacd3, scd, elovl8b, ptgesl, elovl1b, fads2, acot11b, acot11a, ehhadh, acox1, aacs, hadh, mecr, elovl6l	5288	40	14912	1.55098	1	0.993711
GOTERM_BP	GO:0030433~ER-associated ubiquitin-dependent protein catabolic process	17	0.0233078	-1.6325	psmc1a, edem2, man1b1a, edem3, psmc1b, usp19, psmc2, ankzf1, vcp, march6, foxred2, psmc5, psmc6, si:ch211-282j22.3, ubxn8, psmc4, ube2j2	5288	29	14912	1.65309	1	0.993711
GOTERM_BP	GO:0009060~aerobic respiration	12	0.0234043	-1.6307	uqcrc2b, uqcrb, cox20, uqcrc1, sdhb, uqcrc2a, cox11, CHCHD5, mtfr1, pmpcb, cox6a1, mtfr1l	5288	18	14912	1.87998	1	0.993711
GOTERM_BP	GO:0002042~cell migration involved in sprouting angiogenesis	6	0.0236596	-1.62599	fn1a, itga5, efnb2a, cxcr4a, cxcl12b, sirt1	5288	6	14912	2.81997	1	0.993711
GOTERM_BP	GO:0045899~positive regulation of RNA polymerase II transcriptional preinitiation complex assembly	6	0.0236596	-1.62599	psmc1a, psmc5, psmc1b, psmc6, psmc4, psmc2	5288	6	14912	2.81997	1	0.993711
GOTERM_BP	GO:0006596~polyamine biosynthetic process	6	0.0236596	-1.62599	azin1a, oaz1a, odc1, oaz1b, azin1b, amd1	5288	6	14912	2.81997	1	0.993711
GOTERM_BP	GO:0000387~spliceosomal snRNP assembly	11	0.0250394	-1.60138	sart1, snrpe, sart3, snrpd2, snrpc, rbm22, gemin4, gemin8, snrpd1, prmt7, coil	5288	16	14912	1.93873	1	0.993711
GOTERM_BP	GO:0030514~negative regulation of BMP signaling pathway	16	0.0257472	-1.58927	slc33a1, skor1a, nog1, skila, scube2, igfbp3, nup62l, skilb, skib, chrd, atl1, pnpla6, skia, lemd3, smad6a, nog3	5288	27	14912	1.67109	1	0.993711
GOTERM_BP	GO:0035622~intrahepatic bile duct development	10	0.0265016	-1.57673	zeb2b, hnf1ba, gpc1a, arf6a, arf6b, snapc4, prickle1a, vps33b, atp6ap2, dnmt1	5288	14	14912	2.01426	1	0.993711
GOTERM_BP	GO:0006360~transcription from RNA polymerase I promoter	10	0.0265016	-1.57673	wu:fj64h06, polr1c, polr1b, polr2l, polr2eb, polr1d, polr1e, gtf2h1, polr2h, twistnb	5288	14	14912	2.01426	1	0.993711
GOTERM_BP	GO:0006614~SRP-dependent cotranslational protein targeting to membrane	7	0.0270231	-1.56827	srp54, srp9, ssr3, srpr, srp19, srp68, srp72	5288	8	14912	2.46747	1	0.993711
GOTERM_BP	GO:0030512~negative regulation of transforming growth factor beta receptor signaling pathway	9	0.027591	-1.55923	ppm1bb, skor1a, skilb, bambib, skib, skila, tdp2b, ids, skia	5288	12	14912	2.11498	1	0.993711
GOTERM_BP	GO:0045944~positive regulation of transcription from RNA polymerase II promoter	71	0.0280785	-1.55163	ncoa3, tcf3b, tcf3a, mef2ca, si:ch73-21k16.1, cnbpa, e2f7, aire, si:dkey-94l16.4, nfkb2, taf1, pprc1, zgc:123305, creb3l2, e2f8, ahrrb, tcf20, tp63, ccnl1a, epas1a, tet1, ncoa6, gata1a, nr5a2, hif1al, ccnl1b, jund, ssbp3b, ikzf2, zfat, taf4a, crtc2, stat4, leo1, prox1a, jun, june, tet3, tp53bp1, nfixb, rps6ka5, nr5a5, ccnt1, rtraf, setd3, hif1aa, prox2, ccnk, ccnt2a, ssbp3a, ncoa1, brd4, ccnq, me…	5288	163	14912	1.22833	1	0.993711
GOTERM_BP	GO:0007030~Golgi organization	15	0.0284285	-1.54625	clasp2, lman2, cog4, cog2, dnajc28, blzf1, sec23ip, dym, vmp1, arl1, cog7, nsfl1c, lman1, lman2lb, atp8b5a	5288	25	14912	1.69198	1	0.993711
GOTERM_BP	GO:0006366~transcription from RNA polymerase II promoter	34	0.0287951	-1.54068	nr1i2, sall4, polr2gl, elf3, ell, ercc3, polr2c, sall3b, znf516, prdm4, bach1a, snapc5, hivep2b, bach2a, nfat5b, gtf2a1l, znf217, znf831, polr2h, ehf, znf219, polr2a, foxd3, taf9, trip4, gtf2h1, nfil3, hivep2a, hivep1, polr2j, carf, polr2l, polr2eb, xbp1	5288	70	14912	1.3697	1	0.993711
GOTERM_BP	GO:0055114~oxidation-reduction process	242	0.0292587	-1.53374	loxa, phgdh, ndufa4, tm7sf2, dlat, cyp2r1, creg2, zgc:77439, ogdhb, ido1, ccdc57, ndufb8, asphd2, hadh, nos2b, cyb561d2, mical3b, ogfod2, gpd1a, xdh, cyp2k22, l2hgdh, acox1, dus2, mdh2, ptgr2, idh3g, rrm1, dcaf17, pgd, sprb, lbr, hsd17b12b, gdi2, ndufv2, txnrd3, smox, hsd3b7, cyp2aa7, cyp46a1.3, aldh5a1, mt-co2, nos2a, rpe65b, uqcrfs1, nnt, ugdh, acadvl, ywhah, txn2, p4htm, sqlea, nsdhl, mical3a,…	5288	616	14912	1.10785	1	0.993711
GOTERM_BP	GO:0048278~vesicle docking	14	0.0313667	-1.50353	stx17, stx8, stx3a, stx5a, stx12, stx5al, stx10, stx11a, stx1b, stx16, stx11b.1, stx2b, stx7l, cep83	5288	23	14912	1.7165	1	0.993711
GOTERM_BP	GO:0001731~formation of translation preinitiation complex	14	0.0313667	-1.50353	mcts1, eif3s6ip, eif3d, eif3jb, eif3ea, eif3ba, eif4bb, eif3c, eif3ja, eif4h, eif2s3, denr, eif3ha, eif3m	5288	23	14912	1.7165	1	0.993711
GOTERM_BP	GO:0006915~apoptotic process	55	0.0319167	-1.49598	jade1, gdf6a, sgk1, fgfr3, map1sb, ciapin1, map1sa, ercc3, naif1, atcayb, pdcd10a, timm50, opa1, aktip, tax1bp1b, dap3, ube2z, tp63, dffb, tradd, map3k8, sav1, bnip2, pmaip1, pycard, mrpl41, ift57, ypel3, clic4, gapdh, wdr92, pim2, hip1, pdcd10b, rb1, tfpt, atcaya, tigara, ddit4, chac1, stk26, birc6, puf60b, si:dkey-23c22.5, bnipl, bik, apaf1, zgc:113149, prkcda, phlda3, rnf152, zgc:153990, stk3,…	5288	123	14912	1.26096	1	0.993711
GOTERM_BP	GO:0006446~regulation of translational initiation	13	0.0345722	-1.46127	eif3s6ip, eif4a1b, eif3d, eif3jb, gle1, enc2, eif3ea, eif3ba, eif3c, eif4a1a, eif2b1, eif3ja, eif3m	5288	21	14912	1.7457	1	0.993711
GOTERM_BP	GO:0048884~neuromast development	13	0.0345722	-1.46127	slc26a2, ocrl, ap1b1, cldnb, rtn4a, atoh1a, cd74a, kremen1, dkk1a, cav1, kif3b, rgs18, cd74b	5288	21	14912	1.7457	1	0.993711
GOTERM_BP	GO:0009966~regulation of signal transduction	16	0.0376185	-1.4246	birc6, ppp1r2, spry2, xiap, cdc42se2, birc7, nomo, afap1, spred1, spred3, ncln, igbp1, spry1, cnksr2b, cnksr3, afap1l2	5288	28	14912	1.61141	1	0.993711
GOTERM_BP	GO:0016126~sterol biosynthetic process	11	0.0417707	-1.37913	sqlea, hmgcra, tm7sf2, mvda, msmo1, lbr, mvk, pmvk, cyb5r2, ch25h, dhcr7	5288	17	14912	1.82469	1	0.993711
GOTERM_BP	GO:0008654~phospholipid biosynthetic process	15	0.0418823	-1.37797	si:ch1073-145m9.1, si:dkey-205h13.1, gpam, cept1b, cdipt, serac1, selenoi, agpat2, ptdss2, fitm2, ptdss1b, pgs1, tamm41, cept1a, ptdss1a	5288	26	14912	1.62691	1	0.993711
GOTERM_BP	GO:0046856~phosphatidylinositol dephosphorylation	15	0.0418823	-1.37797	inppl1b, ptprq, mtmr2, ocrl, pip4p1b, mtmr1b, inpp5ka, sacm1la, inpp5d, mtmr1a, mtmr8, mtmr7a, inpp5jb, ptena, sacm1lb	5288	26	14912	1.62691	1	0.993711
GOTERM_BP	GO:0006607~NLS-bearing protein import into nucleus	10	0.0456983	-1.3401	nup35, tnpo2, kpna6, kpnb1, kpnb3, kpna3, RANBP2, ipo4, kpna1, kpna4	5288	15	14912	1.87998	1	0.993711
GOTERM_BP	GO:0016575~histone deacetylation	10	0.0456983	-1.3401	sin3aa, tbl1xr1a, hdac5, brms1lb, sin3ab, tbl1x, brms1la, hdac3, brms1, hdac1	5288	15	14912	1.87998	1	0.993711
GOTERM_BP	GO:0010506~regulation of autophagy	14	0.046657	-1.33108	dram1, tp53inp1, dram2b, depdc5, si:ch211-197l9.2, usp13, mtmr8, abl2, mtmr14, vmp1, usp10, soga1, cisd2, mtcl1	5288	24	14912	1.64498	1	0.993711
GOTERM_BP	GO:0006470~protein dephosphorylation	59	0.0486222	-1.31317	ptpn4b, cdc14b, dusp4, ptprnb, ssh1a, ppm1j, pptc7a, ptpmt1, timm50, ptp4a1, ptprn2, ptena, pdp1, pptc7b, ppm1g, ptpn5, dusp19b, ptprga, ptpn9a, ppm1f, acp1, ptpn1, ppm1bb, ptp4a2a, si:ch211-203d1.3, dusp11, cdc14ab, tab1, ppp5c, ptpn18, ptprq, ppm1db, ptpn11a, ppm1la, si:ch211-149b19.3, ptp4a3, si:ch211-195b15.8, ptp4a2b, ptpdc1b, si:ch211-251p5.5, dusp5, ssh2a, dusp16, ppm1k, ptpn12, ssh2b, ptp…	5288	136	14912	1.22337	1	0.993711
GOTERM_BP	GO:0015991~ATP hydrolysis coupled proton transport	22	0.0487833	-1.31173	tcirg1b, atp5mc1, atp1a1a.1, atp6v0d1, atp5mc3b, atp6v1b2, atp1a1a.3, atp5f1b, atp6v1c1b, atp6v0a1a, atp6v1ba, atp5mc3a, atp6v0b, atp6v0a2b, atp6v0ca, atp1a3a, atp1a3b, atp6v1aa, atp1a1b, tcirg1a, atp6v0e1, atp5fa1	5288	43	14912	1.44278	1	0.993711
GOTERM_BP	GO:0048870~cell motility	9	0.0497197	-1.30347	brk1, pld2, pld1a, im:7151449, pld1b, rca2.2, itgb4, srpx2, rca2.1	5288	13	14912	1.95229	1	0.993711
GOTERM_BP	GO:0006378~mRNA polyadenylation	9	0.0497197	-1.30347	cstf2, cpsf6, zc3h3, clp1, cpsf1, cpsf2, papola, cpsf4, pcf11	5288	13	14912	1.95229	1	0.993711
GOTERM_BP	GO:0009408~response to heat	9	0.0497197	-1.30347	dnaja3a, hsf1, dnaja2, dnaja3b, hsp70l, hsp70.1, dnaja2l, dnaja1, gclc	5288	13	14912	1.95229	1	0.993711
GOTERM_BP	GO:0031146~SCF-dependent proteasomal ubiquitin-dependent protein catabolic process	9	0.0497197	-1.30347	fbxo9, fbxw5, rnf7, fbxl15, fbxw4, rbx1, fbxo31, fbxw11b, ccnf	5288	13	14912	1.95229	1	0.993711
GOTERM_BP	GO:0006406~mRNA export from nucleus	13	0.0520074	-1.28393	thoc3, nup88, nup85, eny2, thoc7, nup107, ddx39aa, thoc5, ddx19, gle1, ddx39ab, smg5, smg6	5288	22	14912	1.66635	1	0.993711
GOTERM_BP	GO:0007032~endosome organization	8	0.0536104	-1.27075	aktip, washc4, plekhj1, vps18, vps11, ist1, hook1, spast	5288	11	14912	2.05089	1	0.993711
GOTERM_BP	GO:0071028~nuclear mRNA surveillance	5	0.0565669	-1.24744	exosc9, exosc7, exosc8, exosc6, exosc4	5288	5	14912	2.81997	1	0.993711
GOTERM_BP	GO:0045039~protein import into mitochondrial inner membrane	5	0.0565669	-1.24744	timm13, timm23a, TIMM22, timm10, timm9	5288	5	14912	2.81997	1	0.993711
GOTERM_BP	GO:0006221~pyrimidine nucleotide biosynthetic process	5	0.0565669	-1.24744	umps, erh, ctps1a, cmpk, ctps1b	5288	5	14912	2.81997	1	0.993711
GOTERM_BP	GO:0006913~nucleocytoplasmic transport	7	0.0569115	-1.2448	tprb, ran, anp32b, tpra, nup155, nup58, anp32e	5288	9	14912	2.19331	1	0.993711
GOTERM_BP	GO:0009306~protein secretion	7	0.0569115	-1.2448	rab8b, rab8a, tmem167b, rab13, mon1a, tvp23b, tmem167a	5288	9	14912	2.19331	1	0.993711
GOTERM_BP	GO:0009396~folic acid-containing compound biosynthetic process	7	0.0569115	-1.2448	mthfd2, atp5if1a, fpgs, mthfd1a, mthfd1l, mthfd1b, atp5if1b	5288	9	14912	2.19331	1	0.993711
GOTERM_BP	GO:0006120~mitochondrial electron transport, NADH to ubiquinone	7	0.0569115	-1.2448	ndufa7, ndufb9, mt-nd2, ndufv2, mt-nd4, ndufc2, ndufb8	5288	9	14912	2.19331	1	0.993711
GOTERM_BP	GO:1901409~positive regulation of phosphorylation of RNA polymerase II C-terminal domain	7	0.0569115	-1.2448	ccnt1, ccnk, ccnl1b, ccnt2b, ccnt2a, ccnl1a, ccnq	5288	9	14912	2.19331	1	0.993711
GOTERM_BP	GO:2000785~regulation of autophagosome assembly	7	0.0569115	-1.2448	rab33a, nprl3, tbc1d12b, tbc1d14, nprl2, rab20, rab33ba	5288	9	14912	2.19331	1	0.993711
GOTERM_BP	GO:0016311~dephosphorylation	50	0.0574721	-1.24054	ptpn4b, cdc14b, dusp4, mtmr1b, ptprnb, ssh1a, ptpmt1, ptp4a1, ptprn2, ptena, mtmr2, ptpn5, dusp19b, ptprga, ptpn9a, ptpn1, mtmr1a, mtmr7a, ptp4a2a, si:ch211-203d1.3, dusp11, cdc14ab, mtmr7b, ptpn18, mtmr3, ptprq, ptpn11a, ptp4a3, si:ch211-195b15.8, ptp4a2b, ptpdc1b, mtmr14, si:ch211-251p5.5, dusp5, ssh2a, dusp16, ptpn12, ssh2b, ptpn23a, dusp23a, ptpra, mtmr8, ptprja, dusp28, dusp7, ptpn6, ptpn9b,…	5288	114	14912	1.23683	1	0.993711
GOTERM_BP	GO:0003333~amino acid transmembrane transport	18	0.0574962	-1.24036	slc7a6, slc7a14a, slc6a6b, slc38a2, slc36a4, si:dkeyp-120h9.1, slc7a5, slc7a3a, pex3, SLC7A1 (1 of many), slc32a1, slc7a10a, slc38a3a, slc38a4, slc7a4, slc6a6a, slc7a1, slc38a9	5288	34	14912	1.49293	1	0.993711
GOTERM_BP	GO:0007005~mitochondrion organization	12	0.0580052	-1.23653	dnaja3a, cluha, rhot1a, dnaja3b, chchd2, chchd10, yme1l1b, tmem11, lonp1, mtfr1, yme1l1a, opa1	5288	20	14912	1.69198	1	0.993711
GOTERM_BP	GO:0032784~regulation of DNA-templated transcription, elongation	6	0.0586487	-1.23174	supt5h, tcea3, CABZ01044053.1, tcea1, tcea2, supt6h	5288	7	14912	2.41712	1	0.993711
GOTERM_BP	GO:0000103~sulfate assimilation	6	0.0586487	-1.23174	papss2a, papss1, papss2b, txn2, txnl1, zgc:56493	5288	7	14912	2.41712	1	0.993711
GOTERM_BP	GO:0000154~rRNA modification	6	0.0586487	-1.23174	tfb2m, nat10, rrnad1, dimt1l, nop56, nop58	5288	7	14912	2.41712	1	0.993711
GOTERM_BP	GO:0051443~positive regulation of ubiquitin-protein transferase activity	6	0.0586487	-1.23174	dcun1d1, dcun1d3, dcun1d5, dcun1d2b, dcun1d2a, dcun1d4	5288	7	14912	2.41712	1	0.993711
GOTERM_BP	GO:0000288~nuclear-transcribed mRNA catabolic process, deadenylation-dependent decay	6	0.0586487	-1.23174	cnot1, cnot8, polr2d, cnot3a, cnot7, cnot3b	5288	7	14912	2.41712	1	0.993711
GOTERM_BP	GO:0009058~biosynthetic process	26	0.0653012	-1.18508	aldh1l2, aldh1l1, fdft1, gpt2l, eif2b5, got1, gpt2, gkup, apmap, ccdc57, gmppab, sptlc2b, pcyt2, si:ch211-180m24.3, alas1, got2b, gcat, mtfmt, gmppb, sptlc1, fpgs, olah, kyat3, FO818711.1, eif2b3, si:ch211-180m24.3	5288	54	14912	1.35776	1	0.993711
GOTERM_BP	GO:0031047~gene silencing by RNA	14	0.0664047	-1.1778	tarbp2, snd1, mov10b.2, dicer1, trim71, ago4, tdrd9, ago3b, cnot1, srrt, prkra, cnot11, cnot7, cnot9	5288	25	14912	1.57918	1	0.993711
GOTERM_BP	GO:0046854~phosphatidylinositol phosphorylation	14	0.0664047	-1.1778	pik3r3b, fam126a, pik3c2g, bpnt1, impa1, pik3c2b, pik3cg, pik3r1, impad1, pi4kb, pi4k2a, pik3r3a, pik3cd, si:rp71-17i16.5	5288	25	14912	1.57918	1	0.993711
GOTERM_BP	GO:0042147~retrograde transport, endosome to Golgi	14	0.0664047	-1.1778	snx1a, vps26a, rab41, plekhj1, vps26bl, rab9b, vps35, vti1b, snx1b, gosr2, rab6a, vps54, rab6bb, arl1	5288	25	14912	1.57918	1	0.993711
GOTERM_BP	GO:0030318~melanocyte differentiation	16	0.0720944	-1.1421	mitfa, sox10, slc45a2, leo1, foxd3, kcnj13, psen1, kita, oca2, rnf41, tfap2e, tfap2a, gfpt1, erbb3b, vps11, hdac1	5288	30	14912	1.50398	1	0.993711
GOTERM_BP	GO:0032456~endocytic recycling	10	0.0722598	-1.1411	micall1b.2, rab14, ehd1a, mical3a, ehd4, mical3a, ehd1b, rab13, rab35b, ehd2b, rab11fip3	5288	16	14912	1.76248	1	0.993711
GOTERM_BP	GO:0043248~proteasome assembly	10	0.0722598	-1.1411	adrm1, psmd5, psmd4b, ecpas, pomp, elp2, psmd11b, psmd8, psmd4a, psmd11a	5288	16	14912	1.76248	1	0.993711
GOTERM_BP	GO:0006357~regulation of transcription from RNA polymerase II promoter	107	0.0747458	-1.12641	tcea1, tcea2, si:ch73-21k16.1, pax3a, supt6h, rbl1, etv7, rfxank, barx2, elmsan1a, mapk14b, elmsan1b, sp2, mafb, irf5, ubp1, cited2, znf710a, GMEB2, znf865, tada2a, elf2a, ruvbl2, nfe2l1b, mrgbp, med20, grhl3, elf3, supt5h, zgc:161969, men1, mlx, ddx5, rb1, tfap4, tshz3a, mafgb, runx2a, gabpa, med7, ehf, eny2, rfx7a, pou3f2b, nkx6.1, nfe2l2a, creb5a, BX000363.1, rfx2, grhl2b, fosl1a, relb, mitfa,…	5288	266	14912	1.13435	1	0.993711
GOTERM_BP	GO:0006730~one-carbon metabolic process	18	0.0758815	-1.11986	aldh1l2, mthfd2, aldh1l1, mthfd1a, ca6, ahcyl1, mthfr, ahcy, ca5a, mat2aa, ca2, mat2ab, ahcyl2, fpgs, mthfd1l, shmt1, mthfd1b, mat1a	5288	35	14912	1.45027	1	0.993711
GOTERM_BP	GO:0045454~cell redox homeostasis	28	0.0802852	-1.09536	glrx3, tmx1, dldh, prdx6, ptgesl, txndc12, txnrd3, dnajc10, txnl1, prdx1, zgc:56493, pdia2, txndc11, gclc, tmx2b, irf1b, prdx5, qsox2, aifm1, tmx4, txndc5, pdia6, txndc9, txn2, p4hb, txndc16, nhlrc2, zgc:153284	5288	60	14912	1.31599	1	0.993711
GOTERM_BP	GO:0006123~mitochondrial electron transport, cytochrome c to oxygen	9	0.0806773	-1.09325	cox8a, cox4i1l, cycsb, cox7c, cox4i1, cox5aa, COX5B, cox5ab, cox6a1	5288	14	14912	1.81284	1	0.993711
GOTERM_BP	GO:0045596~negative regulation of cell differentiation	9	0.0806773	-1.09325	skor1a, nog1, skilb, hmgb3b, skib, skila, lrrc14b, skia, nog3	5288	14	14912	1.81284	1	0.993711
GOTERM_BP	GO:0006355~regulation of transcription, DNA-templated	489	0.0837425	-1.07705	sall4, setd1ba, nr1d2b, sfpq, e2f8, barx2, purbb, foxg1a, egr3, pax7a, atf6, mcts1, irf5, foxj1b, hnf4a, tp63, ccnl1a, atf7b, sap130b, nfyal, gatad2ab, sox1b, rbpjb, axin2, bzw1a, nfil3-5, pou6f1, creb5b, dlx5a, med30, prmt1, kmt5b, rnf44, foxa3, dlx6a, irf1a, leo1, eaf1, nfixb, ezh2, rtraf, mta1, pbx1a, cnot11, nfat5b, znf831, hic2, dachd, creb1b, si:dkeyp-118b1.2, nr1d2a, nkx6.1, nkx3-1, rorca,…	5288	1310	14912	1.05265	1	0.993711
GOTERM_BP	GO:0007266~Rho protein signal transduction	12	0.0837815	-1.07685	rock2b, tax1bp3, cdc42ep1a, cdc42ep4a, gna13a, cdc42ep3, zgc:154093, phactr4b, cdc42ep4b, rhoab, cdc42ep2, cdc42ep5	5288	21	14912	1.61141	1	0.993711
GOTERM_BP	GO:0008286~insulin receptor signaling pathway	12	0.0837815	-1.07685	pik3r1, pik3r3b, baiap2a, znf106a, pik3r3a, baiap2l2a, soga1, irs1, si:ch73-335l21.1, irs4a, baiap2l1b, baiap2b	5288	21	14912	1.61141	1	0.993711
GOTERM_BP	GO:0032259~methylation	53	0.0897742	-1.04685	si:ch211-173n18.3, tpmt.1, mettl2a, gnmt, setd1ba, prmt6, mettl27, zgc:162396, shmt1, gamt, klhl23, coq5, trmt2a, ash1l, setd6, pcmtl, dot1l, kmt2ba, nsd3, zgc:109986, mtr, mrm3a, trmt11, ehmt2, cmtr1, prmt1, kmt5b, dnmt1, prmt5, dnmt3ba, ntmt1, tfb2m, armt1, dimt1l, ezh2, ftsj3, setd3, trmt61a, tyw3, cyp51, eef1akmt1, dmap1, carm1, ehmt1a, setd1a, prmt7, prmt3, comtb, bmt2, as3mt, prmt9, trmt2b,…	5288	125	14912	1.19567	1	0.993711
GOTERM_BP	GO:0045737~positive regulation of cyclin-dependent protein serine/threonine kinase activity	8	0.0900376	-1.04558	ccnt1, ccnk, cks2, ccnl1b, ccnt2b, ccnt2a, ccnl1a, ccnq	5288	12	14912	1.87998	1	0.993711
GOTERM_BP	GO:0016050~vesicle organization	11	0.0943764	-1.02514	snx1b, snx11, snx1a, snx6, snx9a, snx18b, snx3, snx5, snx4, snx12, snx33	5288	19	14912	1.63261	1	0.993711
GOTERM_BP	GO:0030705~cytoskeleton-dependent intracellular transport	11	0.0943764	-1.02514	stard9, kif1ab, kif26ba, kif5bb, kif16ba, kif26aa, kif13ba, kif3b, kif1aa, kif5ba, kif13a	5288	19	14912	1.63261	1	0.993711
GOTERM_BP	GO:0006891~intra-Golgi vesicle-mediated transport	11	0.0943764	-1.02514	copb2, gosr2, rab41, copa, copb1, rab6a, cope, rab6bb, cog2, vti1b, cog8	5288	19	14912	1.63261	1	0.993711
GOTERM_BP	GO:0030178~negative regulation of Wnt signaling pathway	16	0.0952722	-1.02103	lzts2b, mylipa, mylipb, rack1, trabd2b, btk, foxo3b, nkd2a, apc2, ctnnbip1, dkk1a, axin1, tsc2, jupa, notum1a, ankrd6b	5288	31	14912	1.45547	1	0.993711
GOTERM_BP	GO:0000209~protein polyubiquitination	30	0.0954615	-1.02017	ube2a, ube2al, rnf126, zgc:175214, chfr, rnf217, ube2na, si:ch211-81a5.1, rnf14, rnf180, ube2g1b, rnf166, ankib1b, ube2kb, RNF14 (1 of many), ube2j2, si:ch211-284e13.12, rnf111, flj11011l, rnf139, stub1, rnf19a, rnf181, rnf114, ube2g1a, rnf41, rnf145a, ube2d1b, klhl42, rnf152	5288	66	14912	1.2818	1	0.993711
GOTERM_BP	GO:0042787~protein ubiquitination involved in ubiquitin-dependent protein catabolic process	47	0.0977125	-1.01005	klhl11, slc47a2.2, si:ch211-281g13.4, rnf126, mylipb, herc3, zgc:175214, keap1a, rnf217, elocb, rmnd5b, si:ch211-81a5.1, si:ch211-281g13.5, ubr5, cul1b, rnf14, cul5b, cul4b, wwp2, ankib1b, hectd3, klhl20, cul2, RNF14 (1 of many), ube3c, si:ch211-284e13.12, btbd2a, rnf111, rnf139, mylipa, rnf7, klhl8, hectd1, rbx1, smurf1, rnf19a, rnf181, spop, btbd3a, btbd6a, trip12, hecw1b, abtb1, rnf145a, btbd9…	5288	110	14912	1.2049	1	0.993711
GOTERM_BP	GO:0001946~lymphangiogenesis	18	0.0977519	-1.00987	arap3, lyve1a, prox1a, e2f7, psen1, nr2f2, syk, zap70, vcam1b, cad, cxcl12a, e2f8, iqsec1b, cxcr4a, LO017700.1, itga9, flt4, itga4	5288	36	14912	1.40998	1	0.993711

## Sheet: GO-BP_melanoma
Category	Term	Count	PValue	log10(Pvalue)	Genes	List.Total	Pop.Hits	Pop.Total	Fold.Enrichment	Benjamini	FDR
GOTERM_BP	GO:0048703~embryonic viscerocranium morphogenesis	58	4.6624e-05	-4.33139	htt, aldh1l1, cnbpa, foxe1, prdm5, lrp5, wnt11r, tbx1, s1pr2, tmem165, rit1, fgf20b, smo, fn1a, loxl3b, ponzr1, itga5, egr1, ptpn11b, edaradd, dlx5a, fsta, dhrs9, dlx4b, ptpn11a, msx1b, grhl3, meis2a, wls, vgll2a, fscn1a, zic2b, dlx1a, gfpt1, caspa, fras1, nog3, nr3c1, nipbla, mkxa, pitx2, sec24d, pak1, zic2a, spns2, kat6a, shha, plcb3, edn1, cxcr4a, foxi1, ednrab, sphk2, wnt4a, smoc2, dlx3b, cri…	6232	91	14912	1.52509	0.0967694	0.0967147
GOTERM_BP	GO:0015991~ATP hydrolysis coupled proton transport	32	5.47338e-05	-4.26174	tcirg1b, atp1a1a.4, atp5mc1, atp6v1ab, atp6v1c1a, atp1a1a.3, atp6ap1b, atp6v1ba, atp1a3a, tcirg1a, atp1a1a.1, atp6v1f, atp6v0d1, atp5mc3b, atp6v0a1b, atp6v1b2, atp6ap1a, atp6v1c1b, atpv0e2, atp6v1h, atp5mc3a, atp6v0b, atp6v0a2b, atp6v0cb, atp6ap1lb, atp6v1e1b, atp6v0ca, atp1a1a.5, atp6v1aa, atp1a1b, atp5fa1, atp6v0e1	6232	43	14912	1.7807	0.0967694	0.0967147
GOTERM_BP	GO:0035556~intracellular signal transduction	179	0.000330288	-3.48111	melk, prkcdb, nuak1b, asb16, braf, mcf2l2, socs5b, rassf3, asb13b, snrkb, mapk14b, si:dkey-110c1.7, gucy2d, shc1, asb5b, si:dkey-172j4.3, adcy5, prex1, prkcea, akap6, tyk2, nrbp2b, CABZ01020835.1, si:ch211-195b13.1, adcy3b, sh2b3, gucy2c, dclk2b, cdc42bpab, rgs7a, plce1, plcd4a, stk38a, shc2, akt2, gpr155a, pkn1a, plek2, gucy1b1, prkd1, rgs9b, pag1, itsn2a, rasgrp3, tiam1a, racgap1, irak1, asb12a…	6232	350	14912	1.22375	0.325754	0.32557
GOTERM_BP	GO:0006096~glycolytic process	26	0.0003685	-3.43356	pkma, pfklb, pfkla, eno1a, hk1, gapdh, gpib, dhtkd1, pfkma, aldoaa, hkdc1, aldocb, gapdhs, aldob, tpi1a, pgam1a, tpi1b, pgk1, eno1b, aldoab, eno2, pgam1b, gck, pfkpa, pfkpb, gpia	6232	35	14912	1.77752	0.325754	0.32557
GOTERM_BP	GO:0051216~cartilage development	50	0.000512778	-3.29007	loxa, htt, sec23b, sec23a, cnbpa, gcm2, uxs1, and2, faf1, creb3l2, mmp14b, sox9a, tmem165, nsd2, barx1, nog1, mmp14a, nog2, grem2b, dcaf7, smo, runx2b, nr5a2, tfap2a, dcn, mbtps2, foxl1, dlx5a, ext2, fgf8a, acvr2ba, sema3d, dlx1a, fgf3, camk1da, nog3, fgfrl1b, inka1a, sparc, foxd3, sox9b, wnt9a, kat6a, and1, edn1, ednrab, skia, matn1, dlx3b, smarcal1	6232	81	14912	1.47704	0.362637	0.362432
GOTERM_BP	GO:0000226~microtubule cytoskeleton organization	40	0.000631228	-3.19981	eml2, mark3b, map7d1a, ppp2r3c, map6b, tacc3, map1sb, prc1b, map7d2b, gapdh, map1sa, nusap1, spast, map7d3, map1b, eml1, zgc:86764, si:ch73-217b7.1, mark3a, atxn7, kif1bp, specc1, gas2l3, map6d1, ninl, tacc1, prc1a, clasp2, maptb, map7a, tubgcp2, aurka, map4l, aurkb, specc1lb, map7d1b, mark2b, mark2a, atxn7l1, si:ch211-195o20.7	6232	62	14912	1.54375	0.372004	0.371793
GOTERM_BP	GO:0015992~proton transport	23	0.000960218	-3.01763	tcirg1b, atp6v1ab, atp5mc1, atp6v1f, atp6v0d1, atp5mc3b, atp6v1b2, atp6v0a1b, atp6v1g1, atp6v1c1a, atp5f1c, mt-atp6, atp6v1c1b, mt-atp8, atp6v1ba, atp5mc3a, atp6v0a2b, atp6v0cb, nnt2, atp6v0ca, atp6v1aa, tcirg1a, atp5fa1	6232	31	14912	1.77531	0.436354	0.436107
GOTERM_BP	GO:0001755~neural crest cell migration	52	0.00110924	-2.95498	zeb2b, hdac4, aldh1l1, plod3, sema4ba, pax3a, sema3fb, sema4ga, nusap1, sema3h, ovol1a, lrp5, nrp2b, sema3ga, sema4ab, sema3fa, tbx1, erbb2, nrg1, lef1, sema4gb, ocrl, disc1, glrx2, sema5a, sema5ba, sema6dl, nrarpa, si:ch211-129c21.1, sox10, acvr2ba, foxc1b, dmxl2, fscn1a, sema3d, sema3gb, gdnfa, nrg2a, sema4e, sema4bb, arl6ip1, sema4c, foxd3, foxc1a, pak1, pard3ab, masp1, phactr4a, erbb3b, foxi1…	6232	87	14912	1.43019	0.436354	0.436107
GOTERM_BP	GO:0007409~axonogenesis	51	0.00111063	-2.95443	lrrc38a, lrfn2b, lingo2a, agrn, lrfn4a, pitpnaa, slitrk4, omd, shtn1, lingo1b, chodl, uba1, kera, lrfn5a, col6a4a, als2a, lrfn5b, spg11, cnr1, si:dkey-6n6.1, si:dkey-32e6.6, ecm2, optn, smn1, slitrk6, prelp, col6a2, slitrk5b, si:ch211-159i8.4, spast, lrrn1, fmodb, aldoaa, wu:fc23c09, washc5, lama1, lum, lingo4b, sqstm1, ctnna2, ogna, zgc:113307, rgs4, appb, lingo3a, pak1, kif22, lrrc38b, omgb, li…	6232	85	14912	1.43569	0.436354	0.436107
GOTERM_BP	GO:0031101~fin regeneration	41	0.00154678	-2.81057	krt17, vdac3, hoxc13a, fgf20a, msx1b, acanb, mmp9, krt5, jag1b, cx43, serpinh1b, sema3d, plcg1, cxcl12a, lamb1a, fam53b, erbb2, nrg1, lef1, fgfr1a, lfng, dre-mir-203a, fynb, scfd1, ctsba, anxa1a, acvr1ba, agr1, esco2, krt91, hapln1a, erbb3b, atp6v1e1b, col1a1a, ttk, prp, igf2b, kdm6bb, wnt5b, sox2, gata3	6232	66	14912	1.48644	0.543274	0.542966
GOTERM_BP	GO:0007229~integrin-mediated signaling pathway	29	0.00169005	-2.7721	adam8a, itgb3a, itga1, ilk, itga11b, adam17a, itga10, itgb1b.1, itgbl1, mibp2, itga2.2, itga6b, itgb2, itga3a, itga6a, itgb3b, itga6l, itgb8, itgb6, itgb1bp1, itgb1b.1, itgb4, itgav, itga5, itga3b, itga2b, itga9, cib2, itga4	6232	43	14912	1.61376	0.543274	0.542966
GOTERM_BP	GO:0016337~single organismal cell-cell adhesion	32	0.00194613	-2.71083	pkp2, AMOTL1, mpzl2b, ctnnd1, wu:fi04e12, rab5c, cxadr, si:dkey-22i16.9, vcam1b, vsig8b, dspa, arvcfb, dlg1l, arvcfa, celsr2, cdh30, si:ch211-66e2.3, ctnna2, pkp3a, vezt, si:ch211-74m13.1, ctnnd2a, si:ch211-74m13.3, vsig8a, rca2.1, gpa33b, fn1a, epcam, mpp5a, lama5, gpa33a, srpx2, pkp1b	6232	49	14912	1.56265	0.546892	0.546583
GOTERM_BP	GO:0000281~mitotic cytokinesis	12	0.00201063	-2.69667	snx18a, cep55l, chmp4ba, aurkb, snx9a, fbxo5, snx9b, apc, nusap1, kif23, snx33, spast	6232	13	14912	2.20875	0.546892	0.546583
GOTERM_BP	GO:0006887~exocytosis	37	0.0033241	-2.47833	stxbp6l, scrn2, si:dkey-45k15.1, sytl2a, pdzd11, vamp8, exoc1, llgl2, rab11bb, tnfaip2a, sytl1, syt7a, scrn3, mical3a, rab11a, sytl4, lin7b, sec22a, rims1b, stx3a, cplane2, sytl2b, mical3b, exoc3l4, sytl3, tnfaip2b, rims1a, vamp3, exoc7, exoc8, rab11al, exoc3, rab25a, scamp5a, exoc3l1, vamp5, lin7a	6232	60	14912	1.47557	0.839573	0.839098
GOTERM_BP	GO:0005975~carbohydrate metabolic process	92	0.00388955	-2.4101	naga, gale, si:ch211-136a13.1, hhipl2, pargl, hk1, kl, zgc:113333, fbp1a, gusb, GBGT1 (1 of many), adpgk, hyal2b, si:ch211-226m16.2, slc3a2a, hexb, ldhba, galt, gpd1c, gbgt1l2, ldhbb, xylb, gnpda2, man2c1, fbp1b, si:ch211-117c19.1, b4galt1, b3gat1a, mlec, agla, chst6, lctla, mgat4a, zgc:66313, mdh1b, pygmb, gnpda1, gpd1b, hyal1, ganab, gba, chst7, chst14, ppp1r3ca, chst2a, pgm2, pgm5, man2b1, b4g…	6232	175	14912	1.25794	0.916896	0.916377
GOTERM_BP	GO:0008544~epidermis development	9	0.00524603	-2.28017	evplb, col17a1a, znf750, grhl3, st14a, spint1b, llgl2, grhl1, spint1a	6232	9	14912	2.39281	1	0.999717
GOTERM_BP	GO:0001649~osteoblast differentiation	12	0.00582457	-2.23474	ptch1, nog1, ext2, spp1, nog2, lgr4, ptch2, ihha, lef1, bmp3, tmem165, nog3	6232	14	14912	2.05098	1	0.999717
GOTERM_BP	GO:0016192~vesicle-mediated transport	82	0.00800729	-2.09651	spag9a, sec23a, kif16bb, stxbp6l, ap1m1, vamp8, kdelr3, stx12l, trip10a, jagn1b, stxbp3, scfd2, use1, stx6, stx2b, golt1bb, sec31a, stx12, sft2d2b, ap2m1b, scfd1, stx11b.1, vps33a, kif16ba, vps41, ap3s2, mon1ba, sft2d1, bcas3, ap3d1, bves, chmp1a, ap1s2, vps11, nck2a, vamp5, si:ch211-208k15.1, ap1s1, optn, trappc11, cltca, golt1ba, vps18, nck1b, fnbp1l, yipf5, tvp23b, vti1b, ap1s3b, vps39, ap1m3,…	6232	157	14912	1.24975	1	0.999717
GOTERM_BP	GO:0007067~mitotic nuclear division	46	0.00843611	-2.07386	lats1, pafah1b1b, mis12, cdca8, ncapd2, fam83d, nusap1, ube2ib, ska3, babam2, seh1l, bora, reep3b, zwilch, klhl21, ncaph, ska1, fign, wee1, spc24, snx9a, dis3l2, nuf2, snx9b, anapc15, ccsapb, snx33, ndc80, arl8ba, kmt5aa, mastl, cenpn, fbxo5, clasp2, cenpw, anapc10, ercc6l, aurka, snx18a, mad2l2, pafah1b1a, aurkb, dctn2, spdl1, usp44, haus6	6232	81	14912	1.35888	1	0.999717
GOTERM_BP	GO:0033334~fin morphogenesis	14	0.00886692	-2.05223	mmp9, cx43, lama5, lef1, itga3b, col1a1a, evx1, dlx5a, col2a1b, apc, hmcn1, fras1, frem1a, grip2a	6232	18	14912	1.86108	1	0.999717
GOTERM_BP	GO:0043473~pigmentation	21	0.00889363	-2.05092	mitfa, tyrp1a, slc45a2, ocrl, slc24a5, tspan36, kcnj13, tyr, kita, tyrp1b, hps5, lrmda, atp6v1h, csf1ra, oca2, gart, cx39.4, aldoaa, adrb2a, paics, gja5b	6232	31	14912	1.62094	1	0.999717
GOTERM_BP	GO:0006508~proteolysis	249	0.00899306	-2.04609	adam17b, si:dkey-33m11.8, casp6l1, adamts18, gzma, pcsk1, cfd, lmln, mmp14b, casp6, psmc6, desi2, atp23, si:dkey-32n7.7, spint1a, si:dkey-78l4.2, sec11a, ctsba, CELA1 (1 of many), mmp2, phex, prss12, acy1, ctsd, mbtps2, zgc:162939, psmb5, mep1a.1, mmp20b, scrn2, capn2b, si:dkey-21e2.12, uchl5, caspa, si:dkey-103e21.5, psma6b, mmel1, si:ch211-51a6.2, psma6a, zgc:152830, hgfa, zgc:174153, si:ch211-…	6232	529	14912	1.12629	1	0.999717
GOTERM_BP	GO:0007049~cell cycle	84	0.00919252	-2.03657	melk, cdc123, prkcdb, mis12, cdkn3, cks1b, e2f7, senp5, fam83d, nusap1, klhl21, ncaph, mybl2b, fign, sept9b, e2f8, ube2s, anapc15, ccsapb, erh, anapc16, chaf1a, tfdp1a, mcts1, arl8ba, rab11fip4a, kmt5aa, mastl, tp63, vcp, ercc6l, esco2, pafah1b1a, sass6, fzr1a, ccnd1, ttk, cdc20, usp44, sept2, hace1, pafah1b1b, rabgap1, banp, cdca8, ncapd2, llgl2, cdc16, ube2ib, spast, ska3, nbn, babam2, seh1l, r…	6232	162	14912	1.24072	1	0.999717
GOTERM_BP	GO:0045165~cell fate commitment	22	0.00927371	-2.03275	trps1, wnt7ab, wnt1, wnt10a, wnt16, wnt3, wnt10b, wnt7ba, wnt2, wnt7aa, wnt11r, wnt6b, gata2a, bmp4, wnt5a, wnt3a, gata6, wnt7bb, gata2b, wnt4a, wnt5b, gata3	6232	33	14912	1.59521	1	0.999717
GOTERM_BP	GO:0031290~retinal ganglion cell axon guidance	24	0.0098416	-2.00693	gli2a, mmp14a, gdf6a, ext2, boc, ptch2, col4a5, cxcl12b, dzip1, slit2, disp1, smo, slbp, cyfip2, sema3d, mmp2, cxcl12a, lamb1a, robo2, lhx2b, alcamb, apc, gli1, lama1	6232	37	14912	1.55209	1	0.999717
GOTERM_BP	GO:0031175~neuron projection development	25	0.0100415	-1.9982	ppp1r9alb, nfkb1, dtnbp1a, cdnf, ppp1r9ba, fryb, gpm6ab, ncam1a, stmn2a, fryl, stmn1b, ppp1r9ala, gdnfa, camsap1a, stmn4, FO704786.1, appb, maptb, ppp1r9a, prickle1a, slc25a46, camsap1b, ppp1r9bb, camsap3, map4l	6232	39	14912	1.53385	1	0.999717
GOTERM_BP	GO:0060536~cartilage morphogenesis	15	0.0101351	-1.99417	mef2ca, grem2b, cyp26b1, chsy1, rap1b, sec24d, col11a2, rap1aa, tbx1, plcb3, edn1, fat3a, sox9a, tmem165, crispld2	6232	20	14912	1.79461	1	0.999717
GOTERM_BP	GO:0051603~proteolysis involved in cellular protein catabolic process	34	0.0101964	-1.99155	psmb5, ctsla, zgc:110239, ctss2.1, psmb3, psmb6, psma3, lgmn, ctsh, cpvl, ctss1, psma2, si:rp71-45k5.4, ctsll, psmb2, psma1, psma6b, ctso, ctsl.1, psmb10, psma6a, psmb4, si:ch211-122f10.4, zgc:174153, ctsba, psma5, psmb7, cts12, psmb1, psma8, ctsc, scpep1, ctsz, ctsf	6232	57	14912	1.42729	1	0.999717
GOTERM_BP	GO:0030036~actin cytoskeleton organization	40	0.0128281	-1.89184	flnb, iqsec3b, coro2a, wasf1, wasf3b, si:ch73-362m14.4, iqsec3a, coro2ba, fscn1a, pfn2, ehd2a, rock1, coro1b, iqsec1b, zgc:109889, flii, ablim3, xirp1, specc1, gas2l3, elmo1, coro1cb, xirp2a, coro1a, pfn1, si:dkey-56f14.7, tmsb2, CABZ01030862.1, coro2bb, palld, pak1, klhl17, daam1a, fmnl2a, diaph3, phactr4a, pfn2l, specc1lb, tagln2, si:ch211-195o20.7	6232	70	14912	1.36732	1	0.999717
GOTERM_BP	GO:0009966~regulation of signal transduction	19	0.0135722	-1.86735	spred2a, birc6, ppp1r2, spry2, xiap, si:ch73-147f11.1, cnksr2a, si:ch211-26b3.4, cdc42se2, birc7, nomo, spred1, spred2b, ncln, spry4, spry1, cnksr2b, cnksr3, zgc:109965	6232	28	14912	1.62369	1	0.999717
GOTERM_BP	GO:0090263~positive regulation of canonical Wnt signaling pathway	13	0.0156765	-1.80475	lypd6, rspo1, bambib, ppp2r3a, fto, dmxl2, bambia, caprin2, ugdh, nup62l, lgr4, fam53b, rnf146	6232	17	14912	1.8298	1	0.999717
GOTERM_BP	GO:0006954~inflammatory response	73	0.0159079	-1.79839	ptgs1, ccl44, sgk1, il1b, ccl20a.3, ccl35.2, ccl34b.8, il17a/f3, nfkb2, ptgs2b, ptger2b, fpr1, cxcl12a, cxcl11.8, tnfrsf9a, mpx, ptger4b, cxcl19, mmp25b, cxcl8a, rela, ptgs2a, fas, tlr3, ccl38a.4, tlr4al, ltb4r2a, si:ch211-112c15.8, ptgir, pycard, hmgb1b, cxcl11.1, tnfrsf9b, CU861476.1, ccl25b, mapkapk2b, ccl19b, hmgb1a, cxcr3.1, tac1, rel, elf3, lta4h, il17a/f1, cxcl20, ccl19a.2, BX323596.2, zgc…	6232	141	14912	1.23883	1	0.999717
GOTERM_BP	GO:0030097~hemopoiesis	51	0.016542	-1.78141	rtkn2a, melk, gfi1b, ifngr1, ptenb, cbfb, hbaa1, waslb, kalrna, dlst, spry4, zfpm1, kmt2a, snx5, glrx5, klf17, cdx4, pttg1ipb, sh2b3, runx2b, rnf145b, runx1, lmo2, kras, tal1, npm1a, arhgef3, vhl, ifng1, irf8, sufu, hbba1, kalrnb, tert, emilin1a, psmd13, pim2, epor, tet2, bmper, gata2a, runx2a, gata2b, ehd3, fbxo5, cxcl12b, stat1b, cebpa, gfi1aa, hbba1, smarcal1	6232	94	14912	1.29823	1	0.999717
GOTERM_BP	GO:0006000~fructose metabolic process	9	0.0165662	-1.78078	pfkfb2b, pfkfb2a, fbp1b, si:dkey-96f10.1, pfkfb4a, fbp1a, pfkfb4b, pfkfb3, pfkfb1	6232	10	14912	2.15353	1	0.999717
GOTERM_BP	GO:0007264~small GTPase mediated signal transduction	147	0.0174605	-1.75794	zgc:101559, ARF4 (1 of many), dock4b, rerglb, rab3aa, arhgdia, rabl3, rac3b, arhgap35b, rab5b, trim23, rap2c, arl3l2, rac1a, rapgefl1, rnd1b, arl8ba, rit1, cplane2, rapgef5a, rrad, hrasa, arhgap31, rab11ba, rhebl1, rem2, arhgap32b, rab8b, rab27b, arhgap33, dock11, rab12, rab27a, plce1, si:dkey-34d22.5, si:dkey-27j5.5, zgc:100918, rhobtb2a, arf3a, rhoj, dock10, rab4a, rasgrp3, gna12a, rab7, dock7,…	6232	305	14912	1.15326	1	0.999717
GOTERM_BP	GO:0043049~otic placode formation	16	0.0199201	-1.70071	sox3, dlx4b, fgf8a, msx1b, wnt8b, sox9b, stm, tfap2a, msx3, bmper, fgf3, foxi1, sox9a, dlx3b, fsta, gata3	6232	23	14912	1.66456	1	0.999717
GOTERM_BP	GO:0030916~otic vesicle formation	10	0.0209446	-1.67893	dlx4b, fgf8a, sparc, atp1a1a.1, fgf3, foxi1, sox9a, igfbp3, dlx3b, sox9b	6232	12	14912	1.99401	1	0.999717
GOTERM_BP	GO:0051225~spindle assembly	10	0.0209446	-1.67893	haus3, si:dkey-170l10.1, map9, haus5, haus4, cenpw, tnksa, stil, haus1, haus6	6232	12	14912	1.99401	1	0.999717
GOTERM_BP	GO:0007219~Notch signaling pathway	29	0.0214611	-1.66835	notch2, heyl, aph1b, jag1b, dla, nrarpb, adam10b, psen2, psenen, chac1, jag1a, rfng, lfng, adam10a, maml1, notch3, gmds, wnt16, dlb, snx5, her6, dlc, jag2a, uchl3, notch1a, dab2, hey1, nrarpa, bap1	6232	49	14912	1.41615	1	0.999717
GOTERM_BP	GO:0007224~smoothened signaling pathway	18	0.021473	-1.66811	si:ch211-185a18.2, gli2a, sufu, b9d1, boc, ptch2, grk3, gli3, scube2, stil, disp1, smo, shha, robo4, ihha, scube1, hhat, gli1	6232	27	14912	1.59521	1	0.999717
GOTERM_BP	GO:0051301~cell division	56	0.0224239	-1.64929	cdc123, cks1b, fam83d, nusap1, klhl21, ncaph, fign, ube2s, anapc15, ccsapb, arl8ba, rab11fip4a, kmt5aa, si:dkey-25o16.4, mastl, ercc6l, mad2l2, pafah1b1a, fzr1a, ccnd1, ttk, cdc20, usp44, sept2, pafah1b1b, cdca8, ncapd2, cdc16, ube2ib, spast, ska3, babam2, seh1l, reep3b, zwilch, cdk1, bora, ska1, rab11fip4b, spc24, dis3l2, nuf2, cdc42l2, ndc80, cks2, cdc42, PKN2 (1 of many), fbxo5, clasp2, cdc45,…	6232	106	14912	1.26413	1	0.999717
GOTERM_BP	GO:0001558~regulation of cell growth	24	0.022586	-1.64616	wisp1b, sgk1, cyr61l2, crim1, esm1, ctgfb, htra1b, wisp1a, igfbp2a, igfbp5a, igfbp1a, socs2, igfbp3, htra4, igfbp6b, si:ch211-195b13.1, epb41l3b, cyr61l1, igfbp7, si:ch211-106h11.3, kazald3, igfbp2b, cyr61, bap1	6232	39	14912	1.4725	1	0.999717
GOTERM_BP	GO:0007076~mitotic chromosome condensation	7	0.0238882	-1.62182	smc2, ncapd3, ncaph, chmp1a, ncapd2, ncapg, cdca5	6232	7	14912	2.39281	1	0.999717
GOTERM_BP	GO:0007275~multicellular organism development	258	0.0250076	-1.60193	uxs1, dkk1b, vax1, creb3l2, shtn1, tbpl1, fzd10, rbm22, arvcfa, gnrh3, wnt16, wif1, adgrv1, pax5, smo, cdx4, sim1a, spred2b, sox1b, hivep1, sfrp1a, pafah1b1a, lmo2, siah1, dlx5a, bves, hey1, dlx6a, en2a, zfat, mylipb, notch2, qkia, pafah1b1b, vps18, jag1b, nifk, eya1, drgx, ift172, wnt6b, pax1b, wnt5a, clptm1, znf831, hoxa11a, c1qtnf12, dkk3b, dachc, dlb, taf8, dkk2, fev, fzd9a, olfml3a, pou3f3a,…	6232	560	14912	1.1024	1	0.999717
GOTERM_BP	GO:0007507~heart development	89	0.0269053	-1.57016	pkp2, aldh1l1, apln, mef2ca, ajuba, setd5, nfat5a, rap1b, pdcd10a, wnt11r, zfpm2a, nf1b, tbx1, fryl, ccm2, s1pr2, ccsapb, snrpd1, eaf2, gins3, xirp1, cyp26a1, csad, rit1, xirp2a, smyd2b, robo1, heg1, atp1a1a.1, tcf7l1b, snai1b, gfer, fn1a, esco2, rbpjb, nf1a, kdm6al, kctd10, ruvbl1, kras, bves, tal1, cdh5, ankrd6b, crip2, ilk, grk3, wrb, ptpn11a, tnnt2a, cdca8, abraa, cx43, nup62l, rap1aa, ywhag1…	6232	179	14912	1.18972	1	0.999717
GOTERM_BP	GO:0042127~regulation of cell proliferation	62	0.0277404	-1.55689	junba, gdf6a, sgk1, atp6ap1b, dusp22b, tfap2e, cxcl11.8, tnfrsf9a, si:ch211-167j9.5, ptk2bb, tgfb3, fes, cdkn1ba, spry2, ndrg1a, zic5, fas, yes1, tyk2, cdkn1bb, si:ch211-195b13.1, ppp1r9bb, s100a10a, tfap2a, fyna, si:ch211-112c15.8, jund, tnk1, tnfrsf9b, cdca7a, ppp1r9ba, jun, frk, june, styk1b, ecrg4a, cxcl20, s100a11, tgfb2, zgc:153631, tgfb2l, zgc:158862, bcl6ab, relt, atp6v1f, ptk2ab, ngfra, …	6232	120	14912	1.23629	1	0.999717
GOTERM_BP	GO:0043065~positive regulation of apoptotic process	29	0.0296547	-1.52791	melk, bbc3, boka, lats1, fadd, ing4, ripk2, bcl2l11, caspa, casp3a, casp2, caspb, bnip3, rela, pawr, osgn1, fas, zgc:73226, bik, dab2ipb, baxa, baxa, hdr, pmaip1, casp8, bnip3lb, mtch2, apc, dusp6	6232	50	14912	1.38783	1	0.999717
GOTERM_BP	GO:0030218~erythrocyte differentiation	25	0.0319817	-1.4951	gfi1b, slc25a38b, alas2, rps29, pdcd2, zfpm1, tet2, casp3a, rps3, slc25a38a, epb41b, snx3, casp3b, klf17, gfi1aa, abcc5, slc4a1a, atp5if1a, lpar3, sfxn4, lmo2, tal1, rpl35a, flvcr1, vhl	6232	42	14912	1.42429	1	0.999717
GOTERM_BP	GO:0033333~fin development	15	0.0320448	-1.49424	sufu, and2, rpz, edar, hhip, tcf7, lama5, and1, lef1, itga3b, col1a1a, col2a1b, hmcn1, fras1, frem1a	6232	22	14912	1.63146	1	0.999717
GOTERM_BP	GO:0071696~ectodermal placode development	8	0.0323515	-1.49011	pnocb, fgf24, tfap2a, fgf3, foxi1, parp3, fgf10b, gata3	6232	9	14912	2.12694	1	0.999717
GOTERM_BP	GO:0006003~fructose 2,6-bisphosphate metabolic process	8	0.0323515	-1.49011	pfkfb2b, pfkfb2a, si:dkey-96f10.1, pfkfb4a, pfkfb4b, pfkfb3, pfkfb1, tigarb	6232	9	14912	2.12694	1	0.999717
GOTERM_BP	GO:0007059~chromosome segregation	21	0.0335604	-1.47417	ndc80, top2a, arl8ba, nek2, kif11, knstrn, cenpn, oip5, mlh1, fam96b, cenph, ska3, ube2ib, seh1l, ska1, mis18a, aurkb, nde1, ndel1a, ndel1b, cenpe	6232	34	14912	1.47791	1	0.999717
GOTERM_BP	GO:0032402~melanosome transport	18	0.0336833	-1.47259	ippk, cdc42, bbip1, ocrl, rab3ip, rab11bb, rab11ba, mkks, rab27b, bbs2, zgc:91968, rab11al, rab27a, bbs7, rab11a, rab25a, bbs5, cct2	6232	28	14912	1.53824	1	0.999717
GOTERM_BP	GO:0001944~vasculature development	33	0.0358887	-1.44504	lgals2a, notch2, pank2, rab4a, cyp26c1, hdac9b, foxc1b, tnnt2a, pdcd10a, pdcd10b, iqsec1b, acvrl1, rab11a, pbx1a, s1pr2, angpt2b, rasip1, cyp26a1, dlk2, fam43b, nr2f1a, appb, foxc1a, fkbpl, enox1, cd44a, spns2, itga5, glrx2, dab2, LO017700.1, ntn4, enpp2	6232	59	14912	1.33835	1	0.999717
GOTERM_BP	GO:0006002~fructose 6-phosphate metabolic process	9	0.0385427	-1.41406	pfkma, pfklb, fbp1b, gfpt1, pfkla, pfkpa, pfkpb, fbp1a, gfpt2	6232	11	14912	1.95775	1	0.999717
GOTERM_BP	GO:0006810~transport	497	0.0414188	-1.3828	si:dkey-28b4.8, atp1a1a.4, ndufa4, rbp5, gabrb2, kcnj1a.1, aqp12, kcnd3, slc12a10.3, ndufs6, gosr2, atg3, trpv4, slc25a55b, cacna1i, chrnb1, slc1a2b, vps35l, slc26a11, grin2ab, cyb561d2, kcnk2a, slc1a5, clcn5b, fabp10b, fyco1b, atp2a3, slc9a2, atp6v1c1b, slc10a7, pafah1b1a, ankhb, ptgdsb.2, si:dkey-106n21.1, BX664625.1, rab4a, vps18, abca1b, mfsd4aa, abcb9, slc25a25a, trpv1, tmed2, aqp10b, ap4b1,…	6232	1120	14912	1.06181	1	0.999717
GOTERM_BP	GO:0019722~calcium-mediated signaling	10	0.0429941	-1.36659	ppp1r9alb, bcl2l10, ppp1r9bb, FO704786.1, ppp1r9ba, ppp1r9ala, mcu, ppp1r9a, selenon, rcan3	6232	13	14912	1.84062	1	0.999717
GOTERM_BP	GO:0016197~endosomal transport	10	0.0429941	-1.36659	wash1, washc4, rassf9, ap5s1, vps16, rab7, bloc1s1, ap5b1, als2a, bloc1s3	6232	13	14912	1.84062	1	0.999717
GOTERM_BP	GO:0006886~intracellular protein transport	105	0.0435652	-1.36086	sec23a, ap1m1, adprh, sytl1, si:ch211-266k8.4, stx6, stx2b, tbc1d9, snx9b, vps16, TBC1D8B, cd74b, snx33, tom1, sytl2b, stx12, ap2m1b, xpo7, snx5, hgs, grtp1a, si:dkey-9k7.3, tnpo2, si:dkey-238d18.4, vps41, tbc1d5, si:ch211-106h4.9, mlphb, tbc1d1, vps11, doc2b, si:dkeyp-19e1.3, cltca, si:ch211-112f3.4, vps18, sytl2a, vti1b, pcf11, vps39, ap1s3b, ldlrb, stx7l, vps8, snx9a, ipo7, sytl4, ap4b1, stx3a…	6232	218	14912	1.1525	1	0.999717
GOTERM_BP	GO:0001501~skeletal system development	22	0.0472269	-1.32581	bcan, nog1, ext2, col27a1b, nog2, acvr2ba, vcanb, acanb, hapln3, igfbp3, rspo2, acana, hapln1b, tfap2a, hapln1a, itga5, fgf3, apc, xpr1b, ptk7a, wnt5b, nog3	6232	37	14912	1.42275	1	0.999717
GOTERM_BP	GO:0008543~fibroblast growth factor receptor signaling pathway	21	0.0481265	-1.31762	ext2, fgf8a, fgf20b, fgfr1b, fgfr3, kl, fgf23, fgf12a, trim71, fgf1b, fgfbp1b, fgf18a, fgfr2, fgf16, fgfr4, fgf3, fgf2, fgfr1a, fgf10b, fgf10a, gata3	6232	35	14912	1.43569	1	0.999717
GOTERM_BP	GO:0060070~canonical Wnt signaling pathway	32	0.0481998	-1.31695	tob1a, dixdc1a, wnt1, jun, dixdc1b, fzd3a, wnt7ba, sfrp2, wnt2, fzd8b, fzd10, lef1, dvl3b, tcf7l2, frzb, ctnnb2, wnt10a, zic5, wnt16, mllt10, tcf7l1b, wnt10b, wnt8b, sfrp5, smo, fzd9a, tcf7, sfrp1a, wnt3a, sfrp1b, apc, wnt4a	6232	58	14912	1.32017	1	0.999717
GOTERM_BP	GO:0045899~positive regulation of RNA polymerase II transcriptional preinitiation complex assembly	6	0.0497819	-1.30293	psmc1a, psmc5, psmc1b, psmc6, psmc4, psmc2	6232	6	14912	2.39281	1	0.999717
GOTERM_BP	GO:0032465~regulation of cytokinesis	6	0.0497819	-1.30293	aurka, birc6, becn1, klhl21, si:ch73-100l22.3, aurkb	6232	6	14912	2.39281	1	0.999717
GOTERM_BP	GO:0042694~muscle cell fate specification	6	0.0497819	-1.30293	gli2a, shha, scube2, disp1, sox6, gli1	6232	6	14912	2.39281	1	0.999717
GOTERM_BP	GO:0021794~thalamus development	6	0.0497819	-1.30293	lhx9, pcdh10b, wnt3a, lhx2b, wnt3, her6	6232	6	14912	2.39281	1	0.999717
GOTERM_BP	GO:0051014~actin filament severing	6	0.0497819	-1.30293	gsnb, srgap2, vil1, scin, flii, gsna	6232	6	14912	2.39281	1	0.999717
GOTERM_BP	GO:0060037~pharyngeal system development	14	0.0505214	-1.29652	barx1, fgf8a, kctd15a, sparc, igfbp3, faf1, twist1b, wnt11r, wnt9a, dnmt3bb.2, tbx1, pknox1.2, tbx2a, twist1a	6232	21	14912	1.59521	1	0.999717
GOTERM_BP	GO:0048884~neuromast development	14	0.0505214	-1.29652	htt, slc26a2, ocrl, cldnb, dkk2, neurog1, atoh1a, cd74a, pcsk5a, kremen1, dkk1a, cib2, cd74b, wnt5b	6232	21	14912	1.59521	1	0.999717
GOTERM_BP	GO:0048747~muscle fiber development	15	0.0509055	-1.29324	b3galnt2, mbnl2, tgfbi, dmrt2b, b4gat1, dag1, unc45b, col6a2, scube2, gne, fkrp, lef1, scube1, fktn, selenon	6232	23	14912	1.56053	1	0.999717
GOTERM_BP	GO:0015914~phospholipid transport	15	0.0509055	-1.29324	atp8b2, pctp, atp10d, stard14, atp11a, atp8b4, tmem30ab, atp10b, atp11c, atp8b1, atp8a1, atp10a, stard7, tmem30aa, atp8b5a	6232	23	14912	1.56053	1	0.999717
GOTERM_BP	GO:0006897~endocytosis	41	0.056691	-1.24649	lmbr1l, usp20, snx10a, becn1, wipf2a, zgc:100846, itsn2a, epn3a, fnbp1l, rab5ab, sh3gl3a, snx4, necap1, trip10a, wipf1b, hip1rb, snx9a, snx30, sb:cb649, snx9b, ap2m1b, csnk1e, snx33, pcdh15a, snx1a, pip5k1ab, snx8a, ocrl, ap2m1b, snx3, snx5, sh3gl3b, wipf2b, fnbp1a, snx18a, csnk1da, ston2, fcho2, epn2, rabep2, scara5	6232	78	14912	1.25776	1	0.999717
GOTERM_BP	GO:0007160~cell-matrix adhesion	26	0.0578856	-1.23743	itgb3a, ilk, si:dkey-71b5.7, itgb1b.1, nid1a, si:dkey-32n7.7, itgb2, itgb3b, zgc:112964, epdr1, si:ch211-150j10.4, itgb8, itgb6, itgb1b.1, si:dkey-261h17.1, itgb4, epdl1, hpse, CU914622.1, si:ch73-181m17.1, si:ch211-182p11.1, si:dkey-239b22.1, pxna, CU914622.2, frem1a, nid2a	6232	46	14912	1.35246	1	0.999717
GOTERM_BP	GO:0006633~fatty acid biosynthetic process	24	0.0613662	-1.21207	msmo1, oxsm, acaca, hsd17b12a, acsm3, elovl4a, elovl2, faxdc2, ch25hl1.1, elovl1a, fa2h, aclya, cbr4, hacd3, scd, elovl1b, hsd17b12b, scdb, ndufab1b, elovl7a, elovl7b, ch25h, mecr, elovl6l	6232	42	14912	1.36732	1	0.999717
GOTERM_BP	GO:0042664~negative regulation of endodermal cell fate specification	7	0.0617445	-1.2094	bmp7a, nog1, fgf24, fgf8a, bmp2b, bmp4, fgfr1a	6232	8	14912	2.09371	1	0.999717
GOTERM_BP	GO:0030182~neuron differentiation	32	0.0618299	-1.2088	si:ch73-119p20.1, fgf8a, wnt7ab, wnt1, cdk5, wnt7ba, atoh1a, wnt2, wnt11r, ctdsp2, wnt6b, wnt5a, runx2a, gli1, sox3, wnt10a, wnt16, casp3b, wnt3, wnt10b, olig2, smo, prox1b, wnt7aa, runx2b, tfap2a, shha, runx1, atp2b2, wnt3a, wnt7bb, wnt5b	6232	59	14912	1.2978	1	0.999717
GOTERM_BP	GO:0016055~Wnt signaling pathway	63	0.0644201	-1.19098	chd8, tob1a, dact2, wnt7ab, dixdc1b, trabd2b, wnt7ba, sfrp2, wnt11r, fzd8b, fzd10, lef1, tcf7l2, rspo1, fermt2, ap2m1b, wnt10a, wnt16, wif1, tnksa, tcf7l1b, wnt3, ndrg2, wnt8b, sfrp5, pygo2, dact1, wnt7aa, csnk1da, tcf7, sfrp1a, lgr4, wnt3a, notum1a, wnt7bb, apc, rnf146, pygo1, dixdc1a, nkd1, fzd5, wnt1, fzd3a, wls, nkd2a, wnt2, znrf3, wnt6b, wnt5a, ptk7a, ap2m1b, csnk1e, c1qtnf12, frzb, amotl2a,…	6232	127	14912	1.18699	1	0.999717
GOTERM_BP	GO:0001946~lymphangiogenesis	21	0.0666873	-1.17596	pkd1a, arap3, notch2, elmo1, lyve1a, prox1a, e2f7, nr2f2, ccbe1, prox1b, vcam1b, cad, cxcl12a, pkd2, e2f8, iqsec1b, cxcr4a, LO017700.1, itga9, itga4, wnt5b	6232	36	14912	1.39581	1	0.999717
GOTERM_BP	GO:0007417~central nervous system development	36	0.0675972	-1.17007	ntrk3a, bcan, lzic, ttpa, smc1a, prnpb, agrn, acanb, glra4a, ecrg4a, casz1, acana, hapln1b, chuk, mbpa, scinla, sox3, appb, tp63, cenpw, fynb, vcanb, hapln3, pcsk9, smo, hsbp1b, irx1a, fyna, hapln1a, shha, glrx2, tpp1, psmd3, ptpro, mob1a, SHC3	6232	68	14912	1.26678	1	0.999717
GOTERM_BP	GO:0060325~face morphogenesis	8	0.069184	-1.15999	jag1b, notch2, edn1, lef1, grhl3, pitx2, crispld2, specc1	6232	10	14912	1.91425	1	0.999717
GOTERM_BP	GO:0001578~microtubule bundle formation	8	0.069184	-1.15999	TPPP, tppp3, prc1a, si:ch211-197l9.2, soga3a, prc1b, mtcl1, spast	6232	10	14912	1.91425	1	0.999717
GOTERM_BP	GO:0030500~regulation of bone mineralization	8	0.069184	-1.15999	omd, abcc6a, ptk2bb, phospho1, ankhb, fgf23, enpp1, twist1b	6232	10	14912	1.91425	1	0.999717
GOTERM_BP	GO:0002062~chondrocyte differentiation	8	0.069184	-1.15999	runx2b, creb3l2, mustn1a, runx1, mustn1b, tmem165, runx2a, wnt5b	6232	10	14912	1.91425	1	0.999717
GOTERM_BP	GO:0046627~negative regulation of insulin receptor signaling pathway	8	0.069184	-1.15999	tsc1a, tsc1b, socs3b, cish, socs2, socs1b, socs3a, socs1a	6232	10	14912	1.91425	1	0.999717
GOTERM_BP	GO:0045010~actin nucleation	8	0.069184	-1.15999	gsnb, vil1, fmn2a, gsna, fmn2b, si:ch1073-209e23.1, fmn1, spire1a	6232	10	14912	1.91425	1	0.999717
GOTERM_BP	GO:0051601~exocyst localization	8	0.069184	-1.15999	exoc8, exoc3, stxbp6l, exoc3l4, tnfaip2b, exoc3l1, exoc1, tnfaip2a	6232	10	14912	1.91425	1	0.999717
GOTERM_BP	GO:0048843~negative regulation of axon extension involved in axon guidance	19	0.0701733	-1.15383	sema4e, sema4bb, si:ch211-129c21.1, sema4ba, sema4c, sema3fb, sema4ga, sema3h, sema3d, sema3ga, sema4ab, robo2, sema3fa, sema5a, sema3gb, sema5bb, sema6dl, sema5ba, sema4gb	6232	32	14912	1.42073	1	0.999717
GOTERM_BP	GO:0033339~pectoral fin development	19	0.0701733	-1.15383	ext2, chsy1, rspo2, osr1, fgf24, kctd10, tcf7, shha, fgf16, lef1, bbs7, col1a1a, pax1b, sox9a, dlx5a, pdlim7, met, bhlha9, dlx6a	6232	32	14912	1.42073	1	0.999717
GOTERM_BP	GO:0030318~melanocyte differentiation	18	0.0718436	-1.14361	mitfa, sox10, slc45a2, slc24a5, foxd3, kcnj13, kita, sox9b, lrmda, csf1ra, oca2, tfap2e, tfap2a, gfpt1, psen2, erbb3b, vps11, gja5b	6232	30	14912	1.43569	1	0.999717
GOTERM_BP	GO:0009953~dorsal/ventral pattern formation	55	0.0724593	-1.13991	zeb2b, gli2a, tob1a, gdf6a, bmpr1ab, ccr7, caprin2, fgf24, fzd8b, scinla, nog1, spry2, kmt5aa, smad1, ctnnb2, gli2b, ahcyl1, gli3, ctsba, igf1, acvr1ba, runx2b, wnt3a, bmpr1ba, fsta, ankrd6b, fgf8a, msx1b, twist1b, jag1b, smad9, nup62l, aida, pkd2, bmp2b, bmper, fgf3, fgfr1a, nog3, bmp7a, il17rd, snai1a, acsl4a, zeb2a, bambia, fcho1, zic2a, fbxl15, shha, edn1, bmp4, sox21a, skia, chrdl2, dusp6	6232	110	14912	1.19641	1	0.999717
GOTERM_BP	GO:0000070~mitotic sister chromatid segregation	9	0.0737387	-1.1323	si:dkey-25o16.4, nsl1, ncaph, mis12, kif18a, dsn1, cdca8, ncapd2, ncapg	6232	12	14912	1.79461	1	0.999717
GOTERM_BP	GO:0007052~mitotic spindle organization	9	0.0737387	-1.1323	aurka, ndc80, lrmp, aurkb, sass6, clasp2, dctn2, stil, cenph	6232	12	14912	1.79461	1	0.999717
GOTERM_BP	GO:0008152~metabolic process	191	0.0740407	-1.13053	phgdh, pfklb, galns, si:dkey-96f10.1, man1b1b, oxct1a, cenpv, nanp, aadacl4, si:ch73-21k16.5, aclya, tigarb, dct, alas2, mcat, acsl3b, hyal2b, zgc:162396, zgc:101699, ogdhb, acss2l, aspa, gart, zgc:158482, fah, hmgcs1, pfkfb2b, gsto1, bcat1, acy3.1, pgam1a, pfkfb1, enpp4, enpp1, dip2bb, auh, acy1, isoc1, zgc:136929, phospho2, gstp1, zgc:66313, arsia, nceh1b.1, acsl1a, hyal1, ctbp2a, ganab, aldh1a…	6232	419	14912	1.09076	1	0.999717
GOTERM_BP	GO:0015986~ATP synthesis coupled proton transport	16	0.0748881	-1.12559	tcirg1b, atp5pd, atp5mc1, atp5mc3b, atp6v0a1b, atp5f1e, atp5f1c, mt-atp6, atp5po, atp5pb, mt-atp8, atp5mc3a, atp6v0a2b, atp5meb, atp5f1d, atp5fa1	6232	26	14912	1.4725	1	0.999717
GOTERM_BP	GO:0007179~transforming growth factor beta receptor signaling pathway	16	0.0748881	-1.12559	smad1, dynlrb1, smad2, dusp22a, smad3a, smad9, tgfb1a, dusp22b, tgfb1b, tgfbr2b, tgfb3, tgfb2, si:dkey-239n17.4, tgfb2l, mstnb, smad6a	6232	26	14912	1.4725	1	0.999717
GOTERM_BP	GO:0009116~nucleoside metabolic process	15	0.0761716	-1.11821	uckl1a, zgc:174895, pnp5b, hprt1, upp1, prpsap1, prtfdc1, prps1a, pnp4a, prpsap2, umps, pnp5a, uprt, hprt1l, prps1b	6232	24	14912	1.49551	1	0.999717
GOTERM_BP	GO:0010506~regulation of autophagy	15	0.0761716	-1.11821	dram1, sqstm1, dram2b, depdc5, si:ch211-197l9.2, tmem173, rragd, mtm1, usp13, rragca, mtmr8, rraga, soga3a, soga1, mtcl1	6232	24	14912	1.49551	1	0.999717
GOTERM_BP	GO:0048812~neuron projection morphogenesis	15	0.0761716	-1.11821	inab, sgk1, nyap2b, ngfb, pcdh18b, nckap1, ntf3, srgap2, si:ch211-195b13.1, bdnf, dbnlb, cad, ngfa, shtn1, dbnla	6232	24	14912	1.49551	1	0.999717
GOTERM_BP	GO:0000902~cell morphogenesis	15	0.0761716	-1.11821	ttn.2, ect2, si:ch211-12m10.1, cxcl12b, fryb, rp2, tenm1, TENM3, TENM2, cxcl12a, tbcc, fryl, cxcr4a, cap2, tagln2	6232	24	14912	1.49551	1	0.999717
GOTERM_BP	GO:0032438~melanosome organization	10	0.0763817	-1.11701	gpr143, tyrp1a, rab32a, pmelb, atp6v0d1, pmela, tyr, atp6ap1b, rab38c, tyrp1b	6232	14	14912	1.70915	1	0.999717
GOTERM_BP	GO:0021952~central nervous system projection neuron axonogenesis	10	0.0763817	-1.11701	emx3, ntn1b, coro1a, slit3, kif22, mapk3, robo2, slit2, ntn1a, kif1bp	6232	14	14912	1.70915	1	0.999717
GOTERM_BP	GO:0000910~cytokinesis	10	0.0763817	-1.11701	kif20a, rab11fip4a, rab11fip4b, map9, zgc:86764, prc1a, ect2, prc1b, arl3, kif23	6232	14	14912	1.70915	1	0.999717
GOTERM_BP	GO:0006123~mitochondrial electron transport, cytochrome c to oxygen	10	0.0763817	-1.11701	cox4i2, cox4i1l, cox6a2, cycsb, cox7c, cox4i1, COX5B, cox5ab, si:dkey-85n7.8, cox6a1	6232	14	14912	1.70915	1	0.999717
GOTERM_BP	GO:0048794~swim bladder development	10	0.0763817	-1.11701	wnt2, elovl1b, fzd5, ihha, wif1, vps11, nsfa, elovl1a, smo, fgf10a	6232	14	14912	1.70915	1	0.999717
GOTERM_BP	GO:0001525~angiogenesis	75	0.076939	-1.11385	vegfbb, mtbl, pld1a, kif11, dla, nrp2b, klf2a, pdcd10a, ackr3b, cds2, plcg1, lpar6a, ptk2bb, rab11a, hexb, spry2, rspo1, fermt2, shc1, pgfb, c1galt1b, itgav, rnf213a, ccbe1, hoxd4a, thsd7aa, robo4, dab2, tal1, itga2b, ntn1a, uxt, plekhg5b, arhgef7b, srpx2, si:dkeyp-69c1.7, esm1, erg, angptl1a, hdac9b, rab5c, wnk1b, pdgfrb, kremen1, pdcd10b, fbxw7, rps29, iqsec1b, lpar2b, lpar6b, cds1, gsk3b, angp…	6232	155	14912	1.15781	1	0.999717
GOTERM_BP	GO:0009615~response to virus	11	0.0777177	-1.10948	ifng1, nfkbiaa, il1b, hnrnpul1, traf6, tlr3, pkz, mxe, rsad2, mxc, mxb	6232	16	14912	1.64506	1	0.999717
GOTERM_BP	GO:0030163~protein catabolic process	13	0.0779086	-1.10841	psmc1a, psmc1b, nots, zgc:63831, psmc2, lonp2, psmc5, psmc3, psmc6, ctsd, clpxb, psmc4, lonp1	6232	20	14912	1.55533	1	0.999717
GOTERM_BP	GO:0030336~negative regulation of cell migration	12	0.0781388	-1.10713	srgap2, miip, plxnb3, ptenb, srgap1a, sinhcaf, s1pr2, srgap1b, srgap3, llgl2, si:dkeyp-69c1.7, churc1	6232	18	14912	1.59521	1	0.999717
GOTERM_BP	GO:0035023~regulation of Rho protein signal transduction	48	0.0784512	-1.1054	quo, arhgef40, si:dkey-91i10.2, ngef, arhgef19, itsn2a, plekhg4, tiam1a, ect2, mcf2l2, tiam1b, kalrnb, bcr, kalrna, arhgef12b, arhgef6, plekhg2, mcf2la, net1, als2b, arhgef1a, arhgef10lb, arhgef16, obscnb, arhgef33, dlc1, arhgef38, spata13, rasgrf2b, arhgef28, si:dkey-38p12.3, als2a, prex1, plekhg7, dnmbp, rasgrf2a, fgd6, arhgef25b, arhgef18a, arhgef39, BX539336.1, arhgef12a, fgd4a, farp2, arhgef…	6232	95	14912	1.209	1	0.999717
GOTERM_BP	GO:0016310~phosphorylation	292	0.081524	-1.08871	melk, mertka, mapk12b, bmpr1ab, pfklb, grk5l, prkcdb, braf, cdkl5, hk1, mob3c, ckmb, prkar2ab, ptk2bb, sbk3, fes, mibp, dapk2b, pim3, map2k6, map2k4b, hgs, plk4, ppm1f, bsk146, pfkfb1, prkcea, pimr179, cdkn1bb, itpka, csnk1da, stk38a, pim1, tnk1, pik3c3, bckdk, akt2, pkn1a, pak6b, mob1a, camk2g2, camk2d1, ripk2, fn3krp, pfkla, ckbb, cdk5, gne, prkcba, dgkaa, chuk, cdk1, MAP3K13, eif2ak3, tgfbr2b,…	6232	654	14912	1.06835	1	0.999717
GOTERM_BP	GO:0007420~brain development	81	0.0822452	-1.08489	chd8, gli2a, mapk3, cnnm2b, ap1m1, mvp, adcyap1b, med14, ddc, amigo1, vax1, h2afy2, tbx2b, scinla, lamb1a, thnsl2, scgn, ccsapb, asphd1, gli1, gdpd3a, gas2l3, atp1a1a.1, ocrl, gnrh3, disc1, adcyap1a, pou3f1, mpp5a, grhl2a, kdm6al, foxl1, psmd3, btbd9, kirrel3l, foxa3, fgf8a, lgi1a, ypel3, jun, sez6l2, pou3f3b, marcksb, etf1b, ldlrb, ap1m3, pafah1b2, dpysl2b, hnmt, bdnf, pcsk7, ywhag1, pcdh19, clp…	6232	169	14912	1.14685	1	0.999717
GOTERM_BP	GO:0006469~negative regulation of protein kinase activity	23	0.083815	-1.07668	flrt1b, socs3b, lrtm1, rtn4rl2a, podn, lrrtm4l1, pkib, flrt2, cish, lrrc4ba, socs2, socs3a, socs1a, socs6b, ppp1r1b, bgna, dcn, si:ch211-237i5.4, aspn, chad, socs1b, pkig, si:dkeyp-69c1.7	6232	41	14912	1.34231	1	0.999717
GOTERM_BP	GO:0042981~regulation of apoptotic process	83	0.0874322	-1.05833	mitfa, gsdf, dlg5a, gdf6a, fadd, sgk1, rbm10, gdf5, card11, bmp3, rassf3, gdf11, traf4b, tnfrsf9a, nme3, tgfb3, nod2, CR759879.1, pak2a, ptgis, cradd, nod1, gdf10b, si:ch211-163c2.2, dedd1, bcl10, traf4a, si:ch211-195b13.1, fyna, pmaip1, si:ch211-112c15.8, rassf6, pycard, perp, ppid, si:cabz01036022.1, traf2b, tnfrsf9b, FO704635.1, casp8l2, boka, rassf2a, ripk2, traf6, gdf10a, mcl1a, bmp5, bmp2b,…	6232	174	14912	1.1414	1	0.999717
GOTERM_BP	GO:0000045~autophagosome assembly	20	0.0925774	-1.0335	atg4b, becn1, atg101, atg16l1, atg16l2, gabarapb, emc6, atg4da, wipi1, atg13, atg9b, wdr45, atg3, map1lc3b, trappc8, map1lc3c, rab23, si:ch1073-143l10.2, gabarapa, tp53inp2	6232	35	14912	1.36732	1	0.999717
GOTERM_BP	GO:0006915~apoptotic process	60	0.0965608	-1.0152	melk, gdf6a, sgk1, prkcdb, apip, prkcbb, fgfr3, map1sb, dffa, map1sa, tigarb, mindy3, atcayb, pdcd10a, ptmab, hip1rb, casp3a, opa1, tax1bp1b, pawr, tp63, fas, casp3b, xaf1, tp73, pmaip1, pak7, siah1, pycard, rybpb, sh3rf1, boka, ypel3, clic4, gapdh, gulp1a, hip1ra, gas2a, tax1bp1a, babam2, pim2, pdcd10b, fgfr2, tgfbr2b, chac1, pidd1, cd27, stk26, birc6, ei24, puf60b, eva1a, si:dkey-23c22.5, bnipl…	6232	123	14912	1.16723	1	0.999717
GOTERM_BP	GO:0007010~cytoskeleton organization	32	0.0968069	-1.01409	ajuba, plecb, llgl2, avil, dpysl2b, vill, vil1, mical3a, mast1b, ptk2bb, cap2, brwd1, ablim3, ablim1b, mast1a, fermt2, mical3b, ptk2ab, mast3b, rp2, elmo2, camsap1b, brwd3, pstpip2, fmnl2a, epb41l3b, blk, si:dkeyp-57f11.2, pak7, dmtn, si:dkeyp-69c1.7, grip2a	6232	61	14912	1.25525	1	0.999717

## Sheet: GO-BP_nevi
Category	Term	Count	PValue	log10(Pvalue)	Genes	List.Total	Pop.Hits	Pop.Total	Fold.Enrichment	Benjamini	FDR
GOTERM_BP	GO:0043473~pigmentation	15	1.98596e-09	-8.70203	mitfa, tyrp1a, slc45a2, slc24a5, tspan36, kcnj13, tyr, kita, tyrp1b, hps5, atp6v1h, oca2, cx39.4, paics, gja5b	968	31	14912	7.45401	2.52813e-06	2.52416e-06
GOTERM_BP	GO:0048066~developmental pigmentation	14	8.47739e-09	-8.07174	sox10, slc45a2, slc24a5, pmela, tyr, pax3a, vps39, kita, hps5, dio2, bnc2, pmelb, ednrba, pax7a	968	29	14912	7.43688	5.39586e-06	5.38738e-06
GOTERM_BP	GO:0032438~melanosome organization	9	6.4224e-07	-6.1923	gpr143, tyrp1a, rab32a, pmelb, pmela, tyr, atp6ap1b, rab38c, tyrp1b	968	14	14912	9.90319	0.000272524	0.000272095
GOTERM_BP	GO:0030318~melanocyte differentiation	11	1.14206e-05	-4.94231	mitfa, oca2, tfap2e, sox10, slc45a2, slc24a5, foxd3, kcnj13, vps11, kita, gja5b	968	30	14912	5.64848	0.00363461	0.0036289
GOTERM_BP	GO:0007229~integrin-mediated signaling pathway	10	0.00148751	-2.82754	itgbl1, adam8a, itga1, itgb1bp1, itgb1b.1, itga11b, itga10, adam17a, itga11a, itgb3b	968	43	14912	3.58255	0.309351	0.308865
GOTERM_BP	GO:0015991~ATP hydrolysis coupled proton transport	10	0.00148751	-2.82754	atp6v1h, atp6v1ab, atp6v0a2b, atp6v0cb, atp6v1f, atp6v1e1b, atp1a1a.3, atp6ap1b, tcirg1a, atp6v0e1	968	43	14912	3.58255	0.309351	0.308865
GOTERM_BP	GO:0097324~melanocyte migration	5	0.00170107	-2.76928	bace2, slc24a5, kcnj13, kita, gja5b	968	9	14912	8.55831	0.309351	0.308865
GOTERM_BP	GO:0007275~multicellular organism development	55	0.00223491	-2.65074	gpr161, gdf6a, pdgfra, ccdc85ca, dzip1, pax3a, klhl40a, sfrp2, tbx2b, prrx1b, spry4, ihha, jag1a, spry1, lfng, pax7a, mylipa, wnt16, wif1, dstyk, pou3f1, smo, hoxc6b, ppdpfa, hivep1, alx4a, hoxc12b, sox6, dlx6a, col27a1b, dixdc1a, tshz2, dbx1b, hoxd3a, tsku, prrx1a, znf536, ebf1a, olfml3b, fibinb, tshz3a, tdrd5, spred2a, dachc, fynb, l1cama, si:dkey-23c22.5, dkk2, fev, wnt9a, hdr, msx3, sfrp1b, o…	968	560	14912	1.51299	0.35563	0.355071
GOTERM_BP	GO:0006811~ion transport	46	0.00673433	-2.17171	atp1b1b, chrnb3a, chrna6, ttyh2l, slc24a5, atp1a1a.3, clic4, ttyh3b, grik5, kcnc4, hrc, slc24a4a, kctd8, FRMD4A, trpv1, trpv6, slc39a1, zgc:172271, cacna1i, asic4a, trpc4b, slc4a2a, glra1, tcirg1a, slc39a10, atp6v1f, kcnj13, atp1b4, grid1a, cacna1bb, cacna1ba, slc12a5b, slc4a4a, slc4a1a, slc38a11, slc4a10a, atp6v0a2b, atp6v0cb, slc4a8, scara5, si:dkey-183j2.10, clcn7, kcnj12a, tpcn1, slco1c1, trp…	968	475	14912	1.49185	0.952533	0.951037
GOTERM_BP	GO:0060036~notochord cell vacuolation	4	0.00780858	-2.10743	atp6v1f, rab32a, atp6v1e1b, vps11	968	7	14912	8.80283	0.994032	0.99247
GOTERM_BP	GO:0060037~pharyngeal system development	6	0.00965124	-2.01542	barx1, wnt9a, kctd15a, pknox1.2, tbx2a, twist1b	968	21	14912	4.40142	1	0.999214
GOTERM_BP	GO:0001755~neural crest cell migration	13	0.0101754	-1.99245	zeb2b, arl6ip1, sox10, sema4c, nrp2a, foxd3, disc1, pax3a, lrp5, nrp2b, tnc, SEMA4D, sema5ba	968	87	14912	2.30189	1	0.999214
GOTERM_BP	GO:0010001~glial cell differentiation	4	0.0118961	-1.9246	sox10, dctn2, disc1, cdkn1ca	968	8	14912	7.70248	1	0.999214
GOTERM_BP	GO:0042438~melanin biosynthetic process	3	0.0120594	-1.91867	oca2, tyrp1a, tyrp1b	968	3	14912	15.405	1	0.999214
GOTERM_BP	GO:0030509~BMP signaling pathway	8	0.0134048	-1.87274	fcho1, gdf6a, bmp2b, bmp3, scube1, rgmb, rgma, bmpr1ba	968	40	14912	3.08099	1	0.999214
GOTERM_BP	GO:0046580~negative regulation of Ras protein signal transduction	5	0.0134797	-1.87032	nf1a, nf1b, rasal2, syngap1b, spry1	968	15	14912	5.13499	1	0.999214
GOTERM_BP	GO:0048484~enteric nervous system development	6	0.014335	-1.8436	meis3, sox10, foxd3, ednrbb, pax3a, ednrba	968	23	14912	4.01868	1	0.999214
GOTERM_BP	GO:0070373~negative regulation of ERK1 and ERK2 cascade	4	0.0169936	-1.76971	nf1a, nf1b, spry4, spry1	968	9	14912	6.84665	1	0.999214
GOTERM_BP	GO:0050935~iridophore differentiation	4	0.0169936	-1.76971	oca2, foxd3, tyr, ednrba	968	9	14912	6.84665	1	0.999214
GOTERM_BP	GO:0014029~neural crest formation	4	0.0169936	-1.76971	zeb2b, mdkb, pax3a, zeb2a	968	9	14912	6.84665	1	0.999214
GOTERM_BP	GO:0035023~regulation of Rho protein signal transduction	13	0.0196057	-1.70762	si:dkey-91i10.2, obscnb, arhgef33, dlc1, spata13, mcf2l2, bcr, arhgef25b, BX539336.1, kalrna, arhgef6, als2b, arhgef3	968	95	14912	2.10805	1	0.999214
GOTERM_BP	GO:0007409~axonogenesis	12	0.0210901	-1.67592	lrrc38a, lingo4b, lum, ctnna2, lrrn1, prelp, epyc, lingo1b, si:ch211-180f4.1, lrfn4a, col6a4a, slitrk5b	968	85	14912	2.17482	1	0.999214
GOTERM_BP	GO:0031032~actomyosin structure organization	5	0.0211991	-1.67368	cnn3a, mylipa, epb41l3b, epb41b, cnn1b	968	17	14912	4.53087	1	0.999214
GOTERM_BP	GO:0007155~cell adhesion	31	0.0249463	-1.60299	dscamb, cdh7a, NCAM2, itga1, pcdh2g5, pcdh7a, itga11b, itga10, rgmb, thbs3a, itga11a, vcla, postna, tbx2b, ncam2, thbs2a, has2, itgb3b, celsr2, ctnna2, ctnnal1, thbs2b, dchs1b, itgb1b.1, vcanb, l1cama, si:dkey-261h17.1, col15a1b, tnc, gpnmb, pcdh10b	968	318	14912	1.50174	1	0.999214
GOTERM_BP	GO:0003406~retinal pigment epithelium development	4	0.0302904	-1.51869	ctsd, vps11, atp6ap1b, otx2b	968	11	14912	5.6018	1	0.999214
GOTERM_BP	GO:0007264~small GTPase mediated signal transduction	29	0.0402451	-1.39529	rhoj, rerglb, rasgrp3, gna12a, rab7, rac3b, gdi1, rab34b, dock3, RAB21, rgl1, rap2b, rabl6b, rab32a, rapgef4, rab9a, nkiras2, arl8a, rab20, rapgef3, rab27b, dock11, si:dkeyp-59c12.1, rab27a, diras1a, rab39ba, rhoub, rab38c, rnd2	968	305	14912	1.46473	1	0.999214
GOTERM_BP	GO:0015992~proton transport	6	0.0473266	-1.32489	atp6v1ab, atp6v0a2b, atp6v0cb, atp6v1f, atp6v1g1, tcirg1a	968	31	14912	2.9816	1	0.999214
GOTERM_BP	GO:0016192~vesicle-mediated transport	17	0.0483701	-1.31542	spag9a, fnbp1l, vps39, vamp3, stx12l, trip10a, fnbp1a, ap3m2, vps41, stx6, ap3s2, mon1ba, mapk8ip3, bcas3, vps11, vamp5, kxd1	968	157	14912	1.66805	1	0.999214
GOTERM_BP	GO:0016525~negative regulation of angiogenesis	5	0.050467	-1.29699	dlk2, yjefn3, thbs2b, thbs2a, ntn1a	968	22	14912	3.50113	1	0.999214
GOTERM_BP	GO:0043401~steroid hormone mediated signaling pathway	10	0.0528438	-1.27701	thrab, esrrgb, nr2f6b, nr4a2b, pgr, nr2f2, nr0b1, esrrb, nr6a1b, rxraa	968	75	14912	2.05399	1	0.999214
GOTERM_BP	GO:0035778~pronephric nephron tubule epithelial cell differentiation	3	0.0529044	-1.27651	prkcz, etv5a, etv4	968	6	14912	7.70248	1	0.999214
GOTERM_BP	GO:0021628~olfactory nerve formation	3	0.0529044	-1.27651	st8sia6, lrrn1, fgfr1a	968	6	14912	7.70248	1	0.999214
GOTERM_BP	GO:0071699~olfactory placode morphogenesis	3	0.0529044	-1.27651	st8sia6, lrrn1, fgfr1a	968	6	14912	7.70248	1	0.999214
GOTERM_BP	GO:0021587~cerebellum morphogenesis	3	0.0529044	-1.27651	hgfa, ptpro, smo	968	6	14912	7.70248	1	0.999214
GOTERM_BP	GO:0007165~signal transduction	95	0.0530527	-1.27529	gpr161, adra2b, rerglb, plxnb1a, stard13a, ank2b, adra2da, caskin1, gpr61, mc1r, pde3a, mtnr1al, adrb1, ccr10, fpr1, p2ry13, nf1b, si:dkey-247m21.3, il1rapl2, lingo1b, ghrhrb, gnai3, plppr5a, celsr2, opn7c, avpr2ab, rgl1, gucy2d, ndrg1a, spock3, dlc1, spock2, si:dkey-204f11.64, si:ch211-176g6.2, pde10a, nf1a, gucy2c, ppp1r1b, gpr85, hivep1, si:dkeyp-59c12.1, rasal2, gngt2a, pde5ab, opn4xb, drd1b,…	968	1233	14912	1.18692	1	0.999214
GOTERM_BP	GO:0048794~swim bladder development	4	0.0578425	-1.23775	ihha, wif1, vps11, smo	968	14	14912	4.40142	1	0.999214
GOTERM_BP	GO:0006518~peptide metabolic process	4	0.0578425	-1.23775	si:ch1073-459j12.1, aebp1, nln, cpxm1a	968	14	14912	4.40142	1	0.999214
GOTERM_BP	GO:0048709~oligodendrocyte differentiation	4	0.0578425	-1.23775	sox10, fgf16, sox9a, enpp2	968	14	14912	4.40142	1	0.999214
GOTERM_BP	GO:0051453~regulation of intracellular pH	6	0.0595133	-1.22539	slc4a4a, slc4a1a, slc26a11, slc4a10a, slc4a8, slc4a2a	968	33	14912	2.8009	1	0.999214
GOTERM_BP	GO:0031101~fin regeneration	9	0.0625766	-1.20359	serpinh1b, cxcl12a, atp6v1e1b, fynb, has2, prp, fgfr1a, lfng, sox2	968	66	14912	2.10068	1	0.999214
GOTERM_BP	GO:0046839~phospholipid dephosphorylation	4	0.0689332	-1.16157	plppr3a, plppr5b, plpp2b, plppr5a	968	15	14912	4.10799	1	0.999214
GOTERM_BP	GO:0006491~N-glycan processing	4	0.0689332	-1.16157	man1b1a, man2a2, mgat4a, mgat4b	968	15	14912	4.10799	1	0.999214
GOTERM_BP	GO:0030239~myofibril assembly	6	0.0733191	-1.13478	megf10, myot, obscnb, cxcl12a, lmod1b, smo	968	35	14912	2.64085	1	0.999214
GOTERM_BP	GO:0007411~axon guidance	10	0.0736557	-1.13279	tnc, nrp2b, si:dkey-288i20.2, kif5bb, kif26aa, cxcl12a, nrp2a, efna3b, ccdc80l1, smo	968	80	14912	1.92562	1	0.999214
GOTERM_BP	GO:0006906~vesicle fusion	8	0.0742885	-1.12908	syt7a, stx6, syt4, sytl4, c2cd4a, vamp5, vamp3, stx12l	968	57	14912	2.1621	1	0.999214
GOTERM_BP	GO:0006644~phospholipid metabolic process	5	0.0750017	-1.12493	plppr3a, plppr5b, plpp2b, plppr5a, zgc:92162	968	25	14912	3.08099	1	0.999214
GOTERM_BP	GO:0071482~cellular response to light stimulus	6	0.0887154	-1.052	opn7c, opn5, opn4xa, opn4xb, opn7d, trpm1b	968	37	14912	2.4981	1	0.999214
GOTERM_BP	GO:1902017~regulation of cilium assembly	3	0.090625	-1.04275	atp6v1f, tbc1d30, atp6ap1b	968	8	14912	5.77686	1	0.999214
GOTERM_BP	GO:0006887~exocytosis	8	0.0921741	-1.03539	syt7a, syt4, sytl4, exoc3l1, vamp5, vamp3, tnfaip2a, lin7a	968	60	14912	2.05399	1	0.999214
GOTERM_BP	GO:0060030~dorsal convergence	4	0.0936955	-1.02828	zeb2b, bmp2b, has2, zeb2a	968	17	14912	3.6247	1	0.999214
GOTERM_BP	GO:0006820~anion transport	5	0.0941258	-1.02629	slc4a4a, slc4a1a, slc4a10a, slc4a8, slc4a2a	968	27	14912	2.85277	1	0.999214
